RESEARCH ARTICLE

# Breaking dependency: The Cinderella complex and barriers to self-employment among rural women in Iran

Zahra Seyedtabatabaei, Mahsa Fatemi \*

Department of Agricultural Extension and Education, School of Agriculture, Shiraz University, Shiraz, Iran

\* [mahsafatemi@shirazu.ac.ir](mailto:mahsafatemi@shirazu.ac.ir)

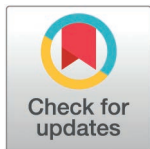

## Abstract

Despite increasing global emphasis on gender equality, rural women in patriarchal societies continue to face complex and multifaceted barriers to economic participation, particularly in self-employment. This study investigates the psychological and socio-structural dynamics influencing self-employment intentions among rural women in Fars Province, Iran, with a particular focus on the Cinderella complex—a psychological pattern characterized by dependency and fear of independence. Drawing on data from a survey of 365 rural women, collected via a structured questionnaire and analyzed using confirmatory factor analysis and path analysis, the research examines how the Cinderella complex mediates the relationship between structural, cultural, and environmental factors and women’s entrepreneurial behavior. Key psychological constructs—self-efficacy, empowerment, and entrepreneurial enthusiasm—were explored as potential enablers of self-employment. Findings reveal that the Cinderella complex exerts a significant negative effect on self-employment by undermining self-efficacy and reducing entrepreneurial enthusiasm. In contrast, higher levels of self-efficacy and enthusiasm positively influence women’s willingness to engage in entrepreneurial activities. Empowerment also emerged as a critical factor, directly enhancing women’s entrepreneurial engagement. Group comparisons revealed that older women experienced higher independence anxiety, university-educated women reported lower Cinderella complex scores and higher self-efficacy, and employed women demonstrated greater empowerment and self-employment engagement than homemakers. The study underscores the importance of addressing both internal psychological barriers and external structural inequalities to foster self-employment among rural women. It advocates for gender-sensitive policies, empowerment programs, educational initiatives, and community-based support systems to transform traditional gender norms and unlock the entrepreneurial potential of rural women in Iran and similar contexts.

## OPEN ACCESS

**Citation:** Seyedtabatabaei Z, Fatemi M (2026) Breaking dependency: The Cinderella complex and barriers to self-employment among rural women in Iran. *PLoS One* 21(2): e0337652. <https://doi.org/10.1371/journal.pone.0337652>

**Editor:** Jianpeng Fan, Pingdingshan University, CHINA

**Received:** August 20, 2025

**Accepted:** January 27, 2026

**Published:** February 25, 2026

**Copyright:** © 2026 Seyedtabatabaei, Fatemi. This is an open access article distributed under the terms of the [Creative Commons Attribution License](https://creativecommons.org/licenses/by/4.0/), which permits unrestricted use, distribution, and reproduction in any medium, provided the original author and source are credited.

**Data availability statement:** All relevant data are within the paper and its [Supporting Information](#) files.

**Funding:** The author(s) received no specific funding for this work.

**Competing interests:** The authors have declared that no competing interests exist.

## 1. Introduction

Despite comprising nearly half of the global population, women continue to face significant barriers to economic participation—particularly in self-employment [1,2]. This underrepresentation is not solely due to structural inequality but also deeply rooted in psychological and socio-cultural dynamics [3]. In patriarchal societies, traditional norms frequently constrain women’s autonomy, conditioning them from early childhood into roles characterized by dependency, passivity, and limited agency [4,5]. The present study explores how structural, cultural, and environmental factors interact with internalized psychological patterns—specifically, the Cinderella complex—to influence women’s entrepreneurial behavior in rural Iran.

In the context of Iran, rural women face compounded barriers to economic participation due to a combination of patriarchal cultural norms, limited access to formal employment, and regional disparities in education and infrastructure [6–9]. While women constitute a significant share of the agricultural and informal sectors, their contributions often remain undervalued and unsupported by formal institutional frameworks [10]. Gender-based restrictions on mobility, property ownership, and credit access further constrain their economic autonomy, particularly in traditional rural communities [11,12]. As a result, rural women in provinces such as Fars are often forced to rely on familial support or informal labor, reinforcing cycles of dependency and vulnerability [13,14]. These systemic constraints underscore the urgent need for empowering pathways—such as self-employment—that can enhance rural women’s agency, income security, and social status [15–18].

The Cinderella complex, a term coined by [19], describes a subconscious desire for protection and a fear of independence, particularly among women socialized in patriarchal contexts. These women are often portrayed as graceful, polite, and beautiful—yet fundamentally incapable of self-directed action [20]. Such narratives reinforce dependency by glorifying external rescue, often embodied by male figures. This dynamic is amplified through overprotective parenting, which limits autonomy and fosters reliance on others for major life decisions [21]. Women exhibiting high levels of this complex may experience diminished self-confidence, emotional dependence, and reluctance to pursue independent economic activity [22].

Recent empirical and theoretical studies suggest that the Cinderella complex is not merely a personality trait but is shaped and reinforced by cultural and socialization processes [23]. In rural and patriarchal contexts, gendered expectations, social norms, and collective family practices can amplify dependency tendencies, constraining self-efficacy and the motivation to pursue independent economic roles [24]. For instance, studies in developing country contexts demonstrate that women exposed to restrictive social norms show higher internalization of dependency beliefs, reduced entrepreneurial intentions, and lower agency in decision-making [25–27]. Integrating these findings situates the Cinderella effect within a broader, context-dependent framework, providing a culturally sensitive lens to understand its impact on women’s entrepreneurial behavior.

In the context of labor markets, especially in developing countries, this dependency translates into underemployment and economic vulnerability [28]. Women

are disproportionately represented in informal, low-wage, or part-time roles and are more likely to depend on family support or government aid [29,30]. Although self-employment offers a pathway to economic independence, flexibility, and innovation [31], psychological barriers—like the Cinderella complex—can prevent women from seizing these opportunities [32,33].

One psychological construct that mediates this dynamic is self-efficacy—defined by Bandura [34,35], as one's belief in their ability to execute specific tasks to achieve desired outcomes. Self-efficacy refers to task-specific competence, closely tied to persistence, resilience, and the ability to navigate uncertainty [36–38]. Women with high self-efficacy are more likely to pursue self-employment, innovate, and persevere despite setbacks [39]. Yet, in environments where women lack positive role models and receive negative reinforcement, their self-efficacy often remains underdeveloped [40,41].

Closely related is the construct of women's empowerment, which refers to the expansion of women's ability to make strategic life choices in a context where this ability was previously denied [42]. Empowerment is multidimensional—encompassing psychological, economic, social, and political domains—and serves as both a process and an outcome [43,44]. Women's empowerment is central to sustainable development and has been shown to reduce poverty, improve health outcomes, and strengthen community resilience [45,46]. However, gender-based discrimination continues to restrict women's access to resources such as education, credit, and leadership roles—obstructing both individual development and broader societal progress [47].

Another pivotal psychological construct examined in this study is entrepreneurial enthusiasm—an affect-laden motivational state that energizes and sustains the pursuit of entrepreneurial goals. Enthusiasm is more than emotional positivity; it encompasses cognitive evaluations of opportunity, emotional arousal, behavioral activation, and expressive cues that signal commitment and resilience [48,49]. It functions both as a personal resource and a social signal—reinforcing confidence internally and projecting credibility externally [50,51]. Importantly, entrepreneurial enthusiasm interacts synergistically with self-efficacy, amplifying motivation and facilitating the reframing of obstacles as growth opportunities [52,53].

This study investigates how the Cinderella complex, self-efficacy, empowerment, and entrepreneurial enthusiasm interact to influence women's decisions regarding self-employment. The research is situated in rural areas of Fars Province, Iran, where gender norms and limited institutional support often constrain women's economic agency. The conceptual model (Fig 1) positions structural, environmental, and cultural factors as independent variables that shape dependency traits; the Cinderella complex as a primary mediator; and self-efficacy, empowerment, and entrepreneurial enthusiasm as second-level mediators that directly influence women's willingness to pursue self-employment. To guide this investigation, the following research questions are posed:

**RQ1:** Do cultural, environmental, and structural factors influence the formation of the psychological index of the Cinderella complex?

**RQ2:** What are the effects of the Cinderella complex on psychological characteristics of women, such as levels of self-efficacy, empowerment, and entrepreneurial enthusiasm, in the context of self-employment?

**RQ3:** What are the key factors influencing women's willingness to engage in self-employment and start their own private business?

## 2. Hypotheses development

The conceptual model of this study draws upon Social Cognitive Theory (SCT) [34,35] and the Theory of Planned Behavior (TPB) [54] to explain the pathways through which contextual and psychological factors influence women's pursuit of self-employment. Both frameworks highlight the interplay between external conditions and internal cognitions in shaping behavior, which provides a strong theoretical basis for positioning the Cinderella complex, self-efficacy, empowerment, and entrepreneurial enthusiasm as key mediating constructs.

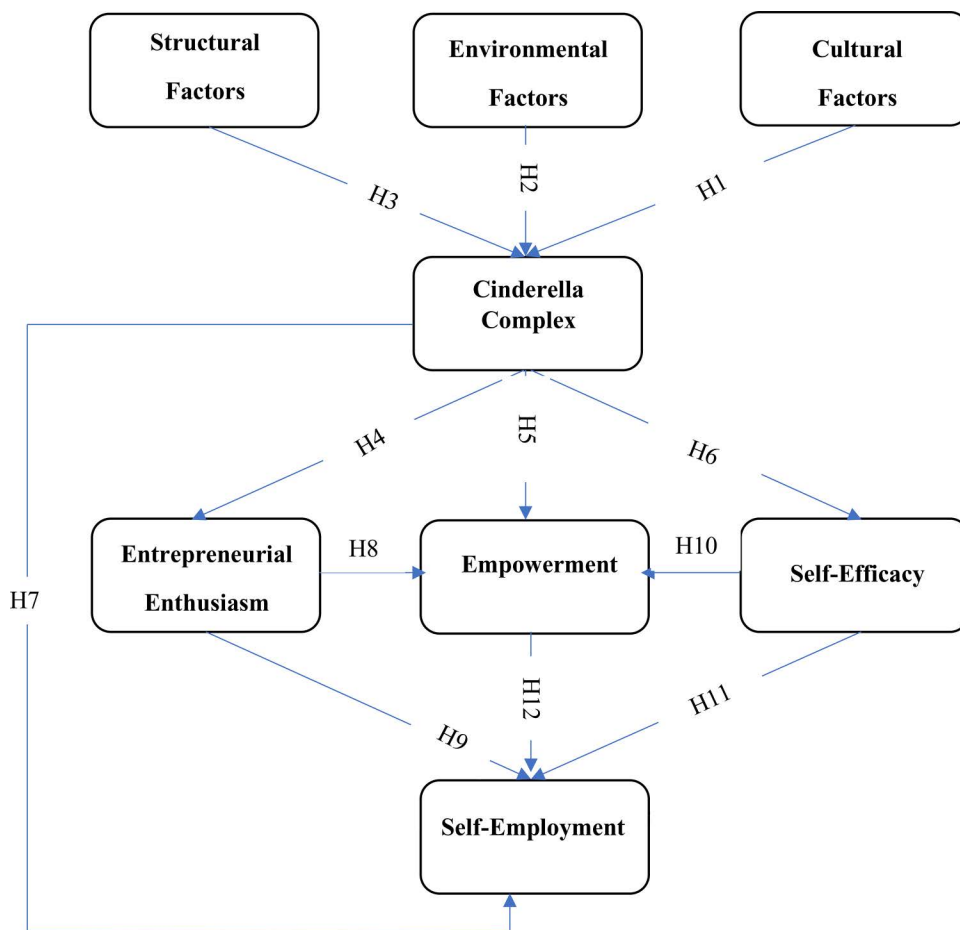

**Fig 1. Conceptual framework of the constructs influencing self-employment among rural women.**

<https://doi.org/10.1371/journal.pone.0337652.g001>

## 2.1. Contextual antecedents and the Cinderella complex

According to SCT, environmental influences play a critical role in shaping cognitive schemas and behavioral tendencies. Cultural values, structural arrangements, and immediate environmental conditions can reinforce or diminish dependency traits in women [35]. Similarly, TPB suggests that normative pressures and perceived control influence women’s attitudes toward autonomy and self-reliance [54]. In patriarchal contexts, cultural and structural systems may either perpetuate reliance on external support or encourage independence, thereby affecting the intensity of the Cinderella complex.

Although Bandura’s work provides a foundational understanding of self-efficacy, subsequent empirical studies highlight that efficacy beliefs are deeply embedded in cultural and socialization processes [55,56]. Research shows that gender norms, power hierarchies, and collective expectations significantly shape how women evaluate their capabilities, particularly in conservative or rural environments [57]. Women exposed to restrictive social norms often report lower efficacy appraisals, limited perceived agency, and a stronger reliance on external authority figures—patterns that closely mirror dependency-oriented dispositions [58]. Integrating these findings strengthens the argument that contextual factors play a decisive role in shaping the cognitive foundations that underlie the Cinderella complex.

**H1:** *Cultural factors negatively influence the formation of the Cinderella complex, such that societies with progressive norms reduce women’s dependency tendencies.*

**H2:** *Favorable environmental conditions, including supportive family and educational settings, are associated with a lower intensity of the Cinderella complex among women.*

**H3:** *Structural factors, such as institutional arrangements and access to resources, significantly shape the extent to which women internalize dependency patterns characteristic of the Cinderella complex.*

## 2.2. Cinderella complex and psychological mediators

The Cinderella complex reflects internalized dependency and fear of independence [19]. From an SCT perspective, such beliefs constrain women's self-efficacy by limiting their confidence in their ability to pursue entrepreneurial activities. Likewise, TPB emphasizes that negative attitudes and perceived lack of control undermine motivation toward goal-directed behavior [59,60]. Thus, the Cinderella complex is expected to suppress entrepreneurial enthusiasm, self-efficacy, and empowerment, which serve as critical psychological precursors to self-employment. Moreover, the Cinderella complex can be conceptualized as a significant psychological barrier within entrepreneurial contexts, as it aligns with broader theories of gendered socialization that emphasize dependency and conformity over autonomy and initiative [22]. By shaping women's beliefs about their own capacities and roles, it indirectly weakens the motivational and cognitive foundations necessary for entrepreneurial action [61]. These dynamics highlight the importance of examining the Cinderella complex not only as an intrapersonal constraint but also as a structural impediment that interacts with cultural expectations to shape women's economic behavior.

While SCT provides the overarching theoretical framework, integrating the Cinderella effect requires attention to cultural and socialization mechanisms. Empirical research indicates that the effect predicts patterns of dependency, risk aversion, and delayed agency that are conceptually aligned with our study's hypotheses [62]. For example, prior work has shown that women socialized in protective and patriarchal environments exhibit lower self-efficacy, diminished empowerment, and reduced entrepreneurial enthusiasm, paralleling the pathways outlined in H4–H7. By explicitly linking these culturally embedded mechanisms to self-efficacy and entrepreneurial outcomes, the study captures the context-dependent nature of the Cinderella effect, particularly in rural Iranian settings [63]. This theoretical contextualization strengthens the rationale for examining the Cinderella complex as both a psychological and socio-cultural construct influencing women's entrepreneurial behavior.

**H4:** *A stronger Cinderella complex diminishes women's entrepreneurial enthusiasm, as internalized dependency undermines motivation to pursue independent economic activity.*

**H5:** *Women exhibiting higher levels of the Cinderella complex experience lower empowerment, reflecting reduced agency and control over personal and economic decisions.*

**H6:** *The Cinderella complex negatively impacts self-efficacy, limiting women's confidence in their ability to achieve entrepreneurial and self-directed goals.*

**H7:** *Higher levels of the Cinderella complex reduce the likelihood of women engaging in self-employment, reflecting the behavioral consequences of dependency tendencies.*

## 2.3. Psychological resources and self-employment

SCT underscores the importance of self-efficacy in driving persistence and resilience in the face of challenges [34]. Women with higher self-efficacy are more likely to engage in proactive economic behavior and resist dependency. Entrepreneurial enthusiasm, as an affective-cognitive state, further strengthens this pathway by energizing individuals toward goal pursuit [64]. Empowerment, reflecting women's agency and control over resources, emerges as both a direct outcome of these psychological resources and a critical mediator that channels them into entrepreneurial behavior.

**H8:** *Entrepreneurial enthusiasm positively influences women's empowerment, as motivated engagement in entrepreneurial activities strengthens agency and decision-making capacity.*

**H9:** Women with greater entrepreneurial enthusiasm are more likely to pursue self-employment, driven by increased motivation and goal-directed behavior.

**H10:** Higher self-efficacy enhances empowerment by enabling women to exert greater control over resources and assert influence in personal and professional domains.

**H11:** Women with stronger self-efficacy are more likely to engage in self-employment, as confidence in one's capabilities translates into entrepreneurial action.

**H12:** Empowerment positively affects self-employment, with women possessing greater agency and social control demonstrating higher propensity to establish independent ventures.

The SCT and TPB provide a coherent framework for linking contextual antecedents, dependency-related cognitions, and psychological mediators to women's entrepreneurial behavior. SCT explains how environmental and cultural factors shape internal cognitions such as the Cinderella complex and self-efficacy, while TPB emphasizes how attitudes, subjective norms, and perceived behavioral control influence enthusiasm, empowerment, and ultimately self-employment (Fig 1).

### 3. Research method

This survey study targeted all rural women residing in Fars Province, Iran, as the statistical population. Based on Krejcie and Morgan [65], a total of 384 individuals were randomly selected as the sample. Considering a 95% response rate, the final sample consisted of 365 rural women from six counties and 52 villages across Fars Province. Data were collected through a structured questionnaire, developed based on previous studies. The face validity of the instrument was confirmed by faculty members at Shiraz University. The data collection was conducted in person over a five-month period, From 27 November 2024 to 22 April 2025, with detailed explanations provided to all participants. This study was reviewed and approved by the Higher Education Committees at both the School of Agriculture and Shiraz University, ensuring adherence to ethical standards. The approval was issued under reference number 3GCB2M224945, dated 2024-11-23. All participants provided written informed consent before taking part in the study. We confirm that all research procedures were conducted in accordance with the relevant ethical guidelines and regulations for research involving human participants, as outlined by the Higher Education Committees at Shiraz University and in compliance with internationally recognized ethical principles. The authors did not access any information that could identify individuals during or after data collection.

The questionnaire was designed to comprehensively cover all dimensions of the study and to measure the relevant research variables. Items were structured using 5 item Likert-type scales depending on the variable. In the initial phase, descriptive statistics of the respondents and mean comparison tests (ANOVA) were conducted and summarized using SPSS26. Subsequently, confirmatory factor analysis (CFA) was employed using SmartPLS3 software to assess the reliability and validity of the research constructs, based on Cronbach's alpha, composite reliability (CR), convergent validity (average variance extracted – AVE), and discriminant validity. Finally, in the last stage, the data were analyzed using path analysis through AMOS<sub>24</sub>.

#### 3.1. Research variables

Environmental factors in this study pertain to two key dimensions: parenting styles within the family context and instructional styles experienced in educational institutions such as schools and universities. Parenting style refers to the overall emotional climate of the parent-child relationship, encompassing specific patterns of interaction between parents and their children. In terms of instructional style, emphasis is placed on pedagogical methods, learning strategies, assessment techniques, and the management of educational processes—factors that collectively influence academic readiness and student development [66,67]. This variable was measured using 14 items on a five-point Likert scale ranging from “Strongly Disagree” to “Strongly Agree.” These items capture women respondents' perceptions of broader gendered practices and social norms in familial and educational environments.

Structural factors refer to broader socio-institutional elements, including social differentiation, patterns of production and labor, systems of communication, levels of functional autonomy, institutional roles, and the distribution of social positions [68]. These factors represent foundational components that shape individual and group behavior within society. In the present study, structural factors were assessed using 8 items rated on a five-point Likert scale, from “Strongly Disagree” to “Strongly Agree.” The items reflect women respondents’ perceptions of institutional and structural constraints affecting gender equality and opportunities within their social context.

Cultural factors encompass values, beliefs, norms, customs, legal traditions, and symbolic elements that characterize a society’s collective identity. Culture is constituted by the shared attitudes, ideologies, and behavioral expectations of social groups, while also allowing for individual variation in interpretation and expression [69]. This variable was measured using 10 items on a Likert scale ranging from “Not at All” to “Very Much.” These items are designed to capture women respondents’ perspectives on societal gender norms, expectations, and cultural practices that shape their experiences and opportunities.

The Cinderella complex—defined as a hidden fear of independence among women—is a psychological condition marked by a subconscious desire to be cared for and rescued, often symbolized by the archetype of a “prince on a white horse” [19]. In this study, the Cinderella complex was operationalized through five distinct dimensions: Independence Anxiety (IA), Avoidance of Responsibility (AR), Unrealistic Expectations (UE), Desire for Uniqueness (DU), and Validation Seeking (VS). These were measured using 44 items on a five-point Likert scale ranging from “Strongly Disagree” to “Strongly Agree.” These items are based on women respondents’ self-assessments of their personal psychological tendencies and beliefs, reflecting individual personality traits related to dependency and autonomy.

Drawing from the literature in organizational psychology, Entrepreneurial enthusiasm is conceptualized as a specific form of positive emotional energy oriented toward future engagement in goal-driven activities, including business creation and entrepreneurial pursuits [70]. It represents both an emotional and motivational construct that supports initiative and persistence. In this study, entrepreneurial enthusiasm was evaluated using 6 items, each rated on a five-point Likert scale from “Strongly Disagree” to “Strongly Agree.” The items reflect women respondents’ personal self-assessments of motivation, interest, and enthusiasm toward entrepreneurial activities.

Empowerment is understood as a multidimensional social process through which individuals gain control over their lives, enabling them to take action on matters they deem important. Empowerment facilitates individual and collective capacity building at various levels: personal, community, and societal [71,72]. In this study, empowerment was examined across four interrelated dimensions. The economic dimension involves providing individuals with the tools and resources necessary for participation in economic life, access to financial opportunities, and achievement of financial independence [73]. The social dimension encompasses the social structures, relationships, and processes that enable individuals to engage meaningfully in their environments and enhance their capacity to act [74]. The psychological dimension refers to internal cognitive and emotional processes that cultivate self-confidence, perceived competence, and the belief in one’s ability to influence personal and professional outcomes [75]. Finally, the political dimension addresses individuals’ engagement with governance structures, including access to political information, participation in voting, advocacy, civic activities, and representation at various levels of decision-making [76]. Empowerment was measured using 21 items across these dimensions, with responses recorded on a five-point Likert scale ranging from “Never” to “Always.” The items capture women respondents’ self-perceptions of their personal empowerment and agency across economic, social, psychological, and political domains.

Self-efficacy is defined as an individual’s belief in their capacity to successfully perform specific tasks and attain desired outcomes. Whether in academic, personal, or professional contexts, self-efficacy plays a crucial role in enabling individuals to persist in the face of challenges, overcome adversity, and strive toward excellence [77]. In the current study, self-efficacy was assessed using 9 items measured on a five-point Likert scale ranging from “Strongly Disagree” to “Strongly Agree.” These items reflect women respondents’ self-assessments of their personal confidence and perceived ability to achieve desired outcomes.

Self-employment refers to a form of economic activity in which individuals derive part or all of their income through business ventures they own and operate independently, rather than through salaried employment under an external employer [78]. In this study, self-employment was measured using two sets of items: four questions using a five-point Likert scale ranging from “Very Low” to “Very High,” and seven questions rated from “Strongly Disagree” to “Strongly Agree.” It should be noted that in this study, self-employment captures respondents’ attitudes, perceptions, and intentions toward engaging in entrepreneurial activity, rather than their actual current employment status. The items capture women respondents’ self-reported entrepreneurial activity, personal engagement in business, and independent income-generating behaviors.

## 4. Results

### 4.1. Demographic overview of the sample

The study sample consisted of 365 rural women from six counties in Fars Province, Iran. To provide a qualitative profile of rural women and categorize respondents based on age and educational attainment, the Interval Standard Deviation from the Mean (ISDM) technique was employed. Recognized as a widely accepted method for qualitative categorization of research variables [79], ISDM segments the obtained scores into three distinct levels, as outlined in Table 1. Accordingly, respondents were classified into three age groups: young, middle-aged, and older adults.

As shown in Table 1, the youngest respondent was 15 years old and the oldest was 71, with an average age of 37.62 years. The highest frequency belonged to the middle-aged group (ages 26–40), accounting for 47.4% of the sample. The older adult category (ages 41–71) comprised 37.5%, while the youngest group (ages 15–25) represented 14% of the sample. In terms of education level, Table 1 indicates that the majority of respondents held university degrees, with 218 individuals (59.7%), followed by 133 respondents (36.4%) with secondary education, and 12 participants (3.3%) who were illiterate or had only completed primary education. Although the proportion of university-educated women may appear high for a rural context, national statistics indicate substantial progress in female education in rural Iran over the past decades. Rural literacy rates increased from 30.5% in 1976 to 78.5% in 2016 [80], and women have consistently comprised the majority of university entrants in recent years [81], accounting for nearly 48% of the student population in 2018–2019 [82]. These trends explain the high representation of university-educated women in the current sample.

The respondents, based on marital status, were categorized into single, married, and female heads of household (widowed or divorced). The majority were married (69.9%), followed by single (24.9%) and female heads of household (4.9%). Regarding employment status, women were divided into three groups: employed in the public sector (22.2%), engaged in private businesses (31%), and unemployed or homemakers (46.3%). Notably, despite the high proportion of university-educated women, a substantial share remained unemployed or homemakers, reflecting the persistently low female labor force participation and structural barriers to employment in rural areas. Respondents were drawn from six counties in Fars Province—Zarqan, Marvdasht, Kavar, Kazeroon, Sarvestan, and Jahrom—each contributing approximately 60 participants.

### 4.2. Comparison of rural women by age group

First, the respondents were compared based on age groups with respect to the study variables. Participants were categorized into three age groups: young, middle-aged, and older women. According to the results, no significant differences were observed between age groups in terms of the overall Cinderella complex.

However, the analysis of variance (ANOVA) results, presented in Table 2, indicated a significant difference among the three age groups for the independence anxiety component ( $P=0.023$ ). According to the LSD post-hoc test, this difference was observed between the young and middle-aged groups compared with the older group. Specifically, the mean score for independence anxiety was higher in older women (42.36) compared to middle-aged (38.58) and young women (37.57), suggesting that concerns about independence, as a component of the Cinderella complex, increases with age.

**Table 1. Frequency distribution of respondents in terms of demographic features.**

| Variables           | Groups              | Frequency      | Percent        | Cumulative Percent |
|---------------------|---------------------|----------------|----------------|--------------------|
| Age                 | Young               | 51             | 14             | 14                 |
|                     | Middle-aged         | 173            | 47.4           | 61.4               |
|                     | Elderly             | 137            | 37.5           | 98.9               |
|                     | No answer           | 4              | 1.1            | 100                |
|                     | Total               | 365            | 100            |                    |
|                     |                     | <i>Max: 71</i> | <i>Min: 15</i> | <i>SD: 9.983</i>   |
| Education           | Primary education   | 12             | 3.3            | 3.3                |
|                     | Secondary education | 133            | 36.4           | 39.7               |
|                     | Higher education    | 218            | 59.7           | 99.5               |
|                     | No answer           | 2              | 0.5            | 100                |
|                     | Total               | 365            | 100            |                    |
|                     |                     | <i>Max:0</i>   | <i>Min: 25</i> | <i>SD: 3.560</i>   |
| Marital status      | Single              | 91             | 24.9           | 24.9               |
|                     | Married             | 255            | 69.9           | 94.8               |
|                     | Self-Supported      | 18             | 4.9            | 99.7               |
|                     | No answer           | 1              | 0.3            | 100                |
|                     | Total               | 365            | 100            |                    |
| Employment          | Public employee     | 81             | 22.2           | 22.2               |
|                     | Self-employed       | 113            | 31             | 53.2               |
|                     | Unemployed          | 169            | 46.3           | 99.5               |
|                     | No answer           | 2              | 0.5            | 100                |
|                     | Total               | 365            | 100            |                    |
| county of residence | Zarghan             | 63             | 17.3           | 17.3               |
|                     | Marvdasht           | 61             | 16.7           | 34                 |
|                     | Kavar               | 60             | 16.4           | 50.4               |
|                     | Kazeroun            | 61             | 16.7           | 67.1               |
|                     | Sarvestan           | 60             | 16.4           | 83.5               |
|                     | Jahrom              | 60             | 16.4           | 100                |
|                     | Total               | 365            | 100            |                    |

<https://doi.org/10.1371/journal.pone.0337652.t001>

Comparisons of the other Cinderella complex components—avoidance of responsibility, unrealistic expectations, desire for uniqueness, and validation seeking—did not reveal significant differences across the three age groups (Table 2).

In addition, the variable empowerment and its components were examined across the three age groups. ANOVA results (Table 2) showed a significant difference for the political empowerment component ( $P=0.001$ ). Post-hoc comparisons indicated that older women had a significantly higher mean score for political empowerment (4.62) compared to middle-aged (3.69) and young women (3.90). This suggests that older women are politically more empowered than their younger counterparts.

#### 4.3. Comparison of rural women by educational level

The means of the study variables were compared across three educational groups: primary education, secondary education, and higher education (Table 3). ANOVA results revealed a significant difference among educational groups for the Cinderella complex ( $P=0.0001$ ). Post-hoc LSD tests indicated that this difference was present across all three groups, with university-educated women reporting the lowest mean score (97.99) and women with primary education the highest

**Table 2. Comparison of rural women across age groups on study variables.**

| Variables                   | Elderly |        | Middle-aged |        | Young  |        | F     | Sig.  |
|-----------------------------|---------|--------|-------------|--------|--------|--------|-------|-------|
|                             | Mean    | SD     | Mean        | SD     | Mean   | SD     |       |       |
| Cinderella Complex          | 101.67  | 21.671 | 101.51      | 24.822 | 106.55 | 27.207 | 1.661 | 0.191 |
| Independence Anxiety        | 37.57a  | 12.166 | 38.58a      | 12.652 | 42.36b | 15.061 | 3.828 | 0.023 |
| Avoidance of Responsibility | 25.43   | 6.175  | 45.54       | 7.446  | 26.12  | 7.924  | 0.284 | 0.753 |
| Unrealistic Expectation     | 8.47    | 2.444  | 8.43        | 2.604  | 8.8    | 2.712  | 0.797 | 0.452 |
| Desire for Uniqueness       | 12.14   | 3.682  | 11.75       | 3.77   | 11.35  | 3.187  | 1.041 | 0.354 |
| Validation Seeking          | 18.06   | 4.768  | 17.21       | 5.351  | 17.93  | 5.594  | 0.901 | 0.407 |
| Self-Efficacy               | 32.08   | 5.298  | 33.75       | 5.606  | 33.97  | 5.676  | 2.249 | 0.107 |
| Empowerment                 | 36.45   | 8.484  | 37          | 9.995  | 38.69  | 11.357 | 1.368 | 0.256 |
| Economic Empowerment        | 8.53    | 3.722  | 9.02        | 3.918  | 9.32   | 4.602  | 0.689 | 0.503 |
| Social Empowerment          | 8.04    | 2.049  | 8.22        | 2.369  | 8.5    | 2.503  | 0.871 | 0.419 |
| Psychological Empowerment   | 15.98   | 3.569  | 16.07       | 4.612  | 16.26  | 4.595  | 0.098 | 0.907 |
| Political Empowerment       | 3.90a   | 2.202  | 3.69a       | 2.201  | 4.62b  | 2.259  | 6.898 | 0.001 |
| Entrepreneurial Enthusiasm  | 21.71   | 3.823  | 21.78       | 4.859  | 21.71  | 4.408  | 0.012 | 0.989 |
| Self-Employment             | 36.53   | 4.851  | 36.86       | 6.423  | 35.31  | 6.507  | 2.428 | 0.09  |
| Cultural Factors            | 19.86   | 5.903  | 19.28       | 6.508  | 18.82  | 5.93   | 0.565 | 0.569 |
| Environmental Factors       | 36.71   | 6.008  | 35.87       | 7.683  | 35.68  | 7.966  | 0.347 | 0.707 |
| Parenting Style             | 17.33   | 3.824  | 17.27       | 4.119  | 17.28  | 4.521  | 0.004 | 0.996 |
| Instructional Style         | 19.37   | 3.555  | 18.6        | 4.53   | 18.4   | 4.4    | 0.935 | 0.394 |
| Structural Factors          | 26.43   | 4.579  | 27.35       | 5.854  | 27.23  | 5.35   | 0.558 | 0.573 |

Means sharing the same letter within a row are not significantly different at the 0.05 level.

**Variables` range:** Cinderella Complex (42–210), Independence Anxiety (17–85), Avoidance of Responsibility (10–50), Unrealistic Expectations (3–15), Desire for Uniqueness (5–25), Validation Seeking (7–35), Self-Efficacy (9–45), Empowerment (0–64), Economic Empowerment (0–20), Social Empowerment (0–12), Psychological Empowerment (0–24), Political Empowerment (0–8), Entrepreneurial Enthusiasm (6–30), Self-Employment (9–45), Cultural Factors (8–40), Environmental Factors (12–60), Parenting Style (6–30), Instructional Style in School and University (6–30), Structural Factors (7–35).

<https://doi.org/10.1371/journal.pone.0337652.t002>

(127.17). These results suggest that higher education, particularly at the university level, is associated with a reduction in the Cinderella complex.

Further analyses of the components of the Cinderella complex revealed significant differences for independence anxiety ( $P=0.0001$ ), with women holding primary education scoring highest (52.67), followed by secondary education (43.54), and university-educated women the lowest (37.11). This finding indicates that higher education fosters greater independence among women. Similarly, avoidance of responsibility and unrealistic expectations exhibited significant differences ( $P=0.0001$ ), with university-educated women demonstrating lower avoidance of responsibility (24.63) and lower unrealistic expectations (8.04) than the other groups, suggesting that higher education promotes responsibility and realistic goal-setting. No significant differences were observed for desire for uniqueness, whereas validation seeking differed significantly, with university-educated women showing the lowest mean (16.82), indicating less reliance on external validation.

Self-efficacy also varied significantly across educational levels ( $P=0.020$ ). Post-hoc comparisons showed that university-educated women reported higher self-efficacy (34.17) than women with primary education (30.33), while no significant differences were observed between secondary education and the other groups. Analysis of empowerment and its components revealed significant differences for overall empowerment ( $P=0.0001$ ), with women with primary education reporting the lowest mean (29.0), secondary education (35.32), and university-educated women the highest (39.45). These results indicate that higher education enhances women’s ability to address challenges and exercise control in personal and social contexts. Specifically, economic empowerment was highest among university-educated

**Table 3. Comparison of study variables among rural women across educational levels.**

| Variables                   | Higher Education |        | Secondary Education |        | Primary Education |        | F      | Sig.   |
|-----------------------------|------------------|--------|---------------------|--------|-------------------|--------|--------|--------|
|                             | Mean             | SD     | Mean                | SD     | Mean              | SD     |        |        |
| Cinderella Complex          | 127.17a          | 28.651 | 110.90b             | 27.371 | 97.99c            | 21.689 | 17.678 | 0.0001 |
| Independence Anxiety        | 52.67a           | 17.259 | 43.54b              | 15.281 | 37.11c            | 11.265 | 15.809 | 0.0001 |
| Avoidance of Responsibility | 31.17a           | 9.154  | 27.32a              | 7.443  | 24.63b            | 7.02   | 9.013  | 0.0001 |
| Unrealistic Expectation     | 11.00a           | 2.045  | 9.28b               | 2.603  | 8.04c             | 2.5    | 15.539 | 0.0001 |
| Desire for Uniqueness       | 11.25            | 2.768  | 12.08               | 3.44   | 11.38             | 3.619  | 1.706  | 0.183  |
| Validation Seeking          | 21.08a           | 4.441  | 18.68a              | 5.675  | 16.82b            | 5.004  | 7.88   | 0.0001 |
| Self-Efficacy               | 30.33b           | 6.02   | 33.03ab             | 5.827  | 34.17a            | 5.35   | 3.941  | 0.02   |
| Empowerment                 | 29.00a           | 9.371  | 35.32b              | 10.925 | 39.45c            | 9.502  | 11.554 | 0.0001 |
| Economic Empowerment        | 5.58a            | 3.605  | 7.95a               | 3.764  | 9.92b             | 4.167  | 14.563 | 0.0001 |
| Social Empowerment          | 7.25a            | 2.417  | 7.95a               | 2.612  | 8.57b             | 2.176  | 4.112  | 0.01   |
| Psychological Empowerment   | 12.33a           | 4.292  | 15.33b              | 4.92   | 16.82c            | 3.99   | 9.51   | 0.0001 |
| Political Empowerment       | 3.83             | 2.725  | 4.08                | 2.286  | 4.15              | 2.214  | 0.128  | 0.879  |
| Entrepreneurial Enthusiasm  | 18.67a           | 4.539  | 22.38b              | 4.471  | 21.57b            | 4.497  | 4.299  | 0.01   |
| Self-Employment             | 31.58a           | 5.485  | 36.10b              | 6.39   | 36.60b            | 6.138  | 3.764  | 0.024  |
| Cultural Factors            | 15.17a           | 4.783  | 17.89a              | 6.062  | 20.21b            | 6.13   | 8.761  | 0.0001 |
| Environmental Factors       | 39.83            | 12.134 | 36.61               | 7.982  | 35.33             | 6.915  | 2.855  | 0.059  |
| Parenting Style             | 20.25a           | 6.298  | 17.74b              | 4.54   | 16.88b            | 3.829  | 4.823  | 0.009  |
| Instructional Style         | 19.58            | 6.667  | 18.86               | 4.334  | 18.45             | 4.208  | 0.669  | 0.513  |
| Structural Factors          | 24.75            | 6.283  | 27.59               | 4.999  | 27.06             | 5.658  | 1.632  | 0.197  |

Means sharing the same letter within a row are not significantly different at the 0.05 level.

**Variables` range:** Cinderella Complex (42–210), Independence Anxiety (17–85), Avoidance of Responsibility (10–50), Unrealistic Expectations (3–15), Desire for Uniqueness (5–25), Validation Seeking (7–35), Self-Efficacy (9–45), Empowerment (0–64), Economic Empowerment (0–20), Social Empowerment (0–12), Psychological Empowerment (0–24), Political Empowerment (0–8), Entrepreneurial Enthusiasm (6–30), Self-Employment (9–45), Cultural Factors (8–40), Environmental Factors (12–60), Parenting Style (6–30), Instructional Style in School and University (6–30), Structural Factors (7–35).

<https://doi.org/10.1371/journal.pone.0337652.t003>

women (9.92). Significant differences were also observed in Social Empowerment ( $P=0.01$ ) and psychological empowerment ( $P=0.0001$ ), with university-educated women scoring highest. No significant differences were found for Political Empowerment.

Regarding entrepreneurial enthusiasm, ANOVA indicated significant differences among educational groups ( $P=0.01$ ). Women with secondary (22.38) and higher education (21.57) demonstrated significantly higher enthusiasm than women with primary education (18.67). Similarly, self-employment differed significantly ( $P=0.024$ ), with university-educated women showing greater intention and engagement in independent business activities, reflecting stronger entrepreneurial attitudes and self-reported business behaviors. For cultural factors, significant differences were observed ( $P=0.0001$ ), with university-educated women scoring highest (20.21). In contrast, environmental factors and instructional style in school and university did not differ significantly across groups. Analysis of parenting style revealed significant differences ( $P=0.009$ ), with primary-educated women reporting the highest mean (20.25). No significant differences were found for Structural Factors.

These findings align with previous research demonstrating that education is a critical determinant of gender equality and women’s empowerment [61]. Higher education equips women with the knowledge, skills, and opportunities necessary for personal and professional development, while limited education can impose economic and social constraints. Education is therefore essential for fostering economic development and enhancing women’s capacity to participate in and benefit from societal growth [83]. Furthermore, individuals with higher education and greater resources are more likely to engage in self-employment, particularly in agricultural sectors [84].

#### 4.4. Comparison of rural women by employment status

ANOVA results (Table 4) indicated significant differences among the three employment groups regarding the Cinderella complex ( $P=0.0001$ ). Post-hoc LSD tests revealed that this difference was observed between homemakers and women employed in either the public or private sector, with homemakers exhibiting the highest mean score (111.85) compared to public-sector employees (96.42) and private-sector employees (96.41). These findings suggest that employment, whether in the public or private sector, is associated with a lower level of the Cinderella complex, whereas homemakers display higher levels.

Analysis of the independence anxiety component also revealed significant differences ( $P=0.0001$ ). LSD tests indicated that homemakers had the highest levels of independence anxiety (43.42) relative to the two employed groups, suggesting that women in the workforce experience greater independence, whereas homemakers are more dependent in managing daily responsibilities. Similarly, the avoidance of responsibility component showed significant differences ( $P=0.0001$ ), with homemakers scoring highest (28.03), indicating lower responsibility-taking compared to employed women. For the unrealistic expectations component, ANOVA results demonstrated significant differences among the three employment groups ( $P=0.0001$ ). LSD tests showed that homemakers had the highest mean (9.27), suggesting that women who are not employed, tend to have less realistic expectations. A significant difference was also observed for the desire for uniqueness component ( $P=0.016$ ), with public-sector employees scoring lower (10.85) and homemakers higher (12.15). The

**Table 4. Comparison of study variables among rural women by employment status.**

| Variables                   | Unemployed |        | Self-employed |        | Public employee |        | F      | Sig.   |
|-----------------------------|------------|--------|---------------|--------|-----------------|--------|--------|--------|
|                             | Mean       | SD     | Mean          | SD     | Mean            | SD     |        |        |
| Cinderella Complex          | 96.42a     | 24.306 | 96.41a        | 19.381 | 111.85b         | 27.077 | 18.224 | 0.0001 |
| Independence Anxiety        | 37.32a     | 11.475 | 36.65a        | 11.348 | 43.42b          | 15.189 | 10.816 | 0.0001 |
| Avoidance of Responsibility | 23.60a     | 7.628  | 24.09a        | 6.377  | 28.03b          | 7.484  | 15.092 | 0.0001 |
| Unrealistic Expectation     | 7.06a      | 2.532  | 7.96a         | 2.407  | 9.27b           | 2.659  | 11.242 | 0.0001 |
| Desire for Uniqueness       | 10.85a     | 3.575  | 11.39ab       | 3.478  | 12.15b          | 3.474  | 4.166  | 0.016  |
| Validation Seeking          | 16.58a     | 5.201  | 16.33a        | 4.388  | 18.97b          | 5.739  | 10.678 | 0.0001 |
| Self-Efficacy               | 34.74a     | 5.125  | 35.14a        | 4.998  | 32.11b          | 5.796  | 2.759  | 0.0001 |
| Empowerment                 | 42.53a     | 9.517  | 38.04b        | 8.988  | 34.97c          | 10.658 | 16.075 | 0.0001 |
| Economic Empowerment        | 11.63a     | 3.929  | 9.46b         | 3.732  | 7.53c           | 3.873  | 13.179 | 0.0001 |
| Social Empowerment          | 8.83a      | 2.126  | 8.64a         | 1.964  | 7.84b           | 2.635  | 6.524  | 0.002  |
| Psychological Empowerment   | 17.49a     | 3.775  | 16.19b        | 4.159  | 15.48b          | 4.793  | 5.773  | 0.003  |
| Political Empowerment       | 4.58a      | 2.15   | 3.74b         | 2.039  | 4.12ab          | 2.416  | 3.285  | 0.039  |
| Entrepreneurial Enthusiasm  | 21.1       | 4.491  | 22.04         | 4.508  | 21.95           | 4.513  | 0.231  | 0.293  |
| Self-Employment             | 34.57a     | 6.257  | 38.27b        | 5.787  | 35.75a          | 6.235  | 9.864  | 0.0001 |
| Cultural Factors            | 20.42a     | 6.551  | 19.96a        | 5.641  | 18.07b          | 6.228  | 5.383  | 0.005  |
| Environmental Factors       | 35.72      | 7.415  | 35.24         | 6.328  | 36.57           | 8.374  | 1.109  | 0.331  |
| Parenting Style             | 17.46      | 3.908  | 16.61         | 3.897  | 17.73           | 4.585  | 2.435  | 0.089  |
| Instructional Style         | 18.26      | 4.398  | 18.63         | 3.756  | 18.84           | 4.685  | 0.489  | 0.613  |
| Structural Factors          | 26.56      | 5.566  | 27.23         | 5.407  | 27.58           | 5.441  | 0.965  | 0.382  |

Means sharing the same letter within a row are not significantly different at the 0.05 level.

**Variables` range:** Cinderella Complex (42–210), Independence Anxiety (17–85), Avoidance of Responsibility (10–50), Unrealistic Expectations (3–15), Desire for Uniqueness (5–25), Validation Seeking (7–35), Self-Efficacy (9–45), Empowerment (0–64), Economic Empowerment (0–20), Social Empowerment (0–12), Psychological Empowerment (0–24), Political Empowerment (0–8), Entrepreneurial Enthusiasm (6–30), Self-Employment (9–45), Cultural Factors (8–40), Environmental Factors (12–60), Parenting Style (6–30), Instructional Style in School and University (6–30), Structural Factors (7–35).

<https://doi.org/10.1371/journal.pone.0337652.t004>

validation seeking component demonstrated significant differences ( $P=0.0001$ ), with homemakers reporting the highest mean (18.97), indicating a greater need for external validation.

Regarding empowerment, significant differences were found among employment groups ( $P=0.0001$ ), with public-sector employees reporting the highest overall empowerment (42.53), followed by private-sector employees (38.04), and homemakers the lowest (34.97). Economic empowerment showed a similar pattern, with public-sector women scoring highest (11.63), private-sector women intermediate (9.46), and homemakers lowest (7.53). Social empowerment differed significantly among groups ( $P=0.002$ ), with employed women more socially empowered (public: 8.83, private: 8.64) than homemakers (7.84). Psychological empowerment also showed significant differences ( $P=0.003$ ), with public-sector employees achieving the highest scores (17.49), likely reflecting greater stability and clarity regarding work-related risks. Political empowerment differed significantly between public- and private-sector employees, with public-sector women scoring higher (4.58).

No significant differences were observed among employment groups for entrepreneurial enthusiasm. However, Self-efficacy differed significantly ( $P=0.0001$ ), with homemakers reporting the lowest mean (32.11), indicating that employment enhances self-efficacy. Cultural Factors also varied significantly by employment status ( $P=0.005$ ), with homemakers scoring lowest (18.07) and public- and private-sector employees higher (20.42 and 19.96, respectively). Regarding self-employment, significant differences were observed ( $P=0.0001$ ), with private-sector women exhibiting the highest mean (38.27), suggesting that women employed in the private sector are more inclined toward entrepreneurial engagement. No significant differences were found in Environmental factors or its components (Parenting style in the family; instructional style in school and university) across employment groups. Similarly, structural factors did not vary significantly among the three groups.

#### 4.5. Research variables: Validity and reliability

The overall measurement model, aligned with the study's conceptual framework (Fig 1), was constructed using Smart PLS3 software (Fig 2). The values for factor loadings, composite reliability, and convergent validity of the items related to the key research variables are presented in Table 5. The variable self-efficacy initially consisted of 9 items. All 9 items showed factor loadings above 0.40, confirming their reliability. As reported in Table 5, the Cronbach's alpha was 0.803, and composite reliability was 0.848—both exceeding the acceptable threshold of 0.70. The AVE value was 0.501, indicating acceptable convergent validity. The variable entrepreneurial enthusiasm consisted of 6 items. As shown in Table 5, all factor loadings exceeded 0.40, confirming acceptable reliability. The Cronbach's alpha and composite reliability for this construct were 0.779 and 0.842, respectively—both within acceptable limits. The AVE value for this construct was 0.580, demonstrating suitable convergent validity. The variable self-employment initially included 11 items. However, after performing confirmatory factor analysis, 2 items with factor loadings below 0.40 were removed. Ultimately, 9 items remained with acceptable factor loadings, as presented in Table 5. This construct showed strong reliability with a Cronbach's alpha of 0.813, composite reliability of 0.855, and AVE of 0.507. Each construct demonstrated adequate levels of reliability and convergent validity, supporting the robustness of the measurement model.

The variable cultural factors were initially measured using 10 items. After conducting the analysis, 2 items with factor loadings below 0.40 were removed, leaving 8 items with acceptable factor loadings (Table 5). The Cronbach's alpha for this variable was 0.754, confirming its reliability. Additionally, the composite reliability (0.817) and the AVE (0.50) values were also within acceptable thresholds, as shown in Table 5. Regarding structural factors, after confirmatory factor analysis, one item with a factor loading below 0.40 was removed, resulting in a final set of 7 items with acceptable factor loadings. The Cronbach's alpha for this construct was 0.812, indicating strong internal consistency. The composite reliability was 0.859, and the AVE was 0.570, both demonstrating adequate construct reliability.

One of the criteria for assessing model fit is discriminant validity, which contrasts with convergent validity. In this study, the Fornell and Larcker method [85] was used to evaluate discriminant validity. This type of validity is considered

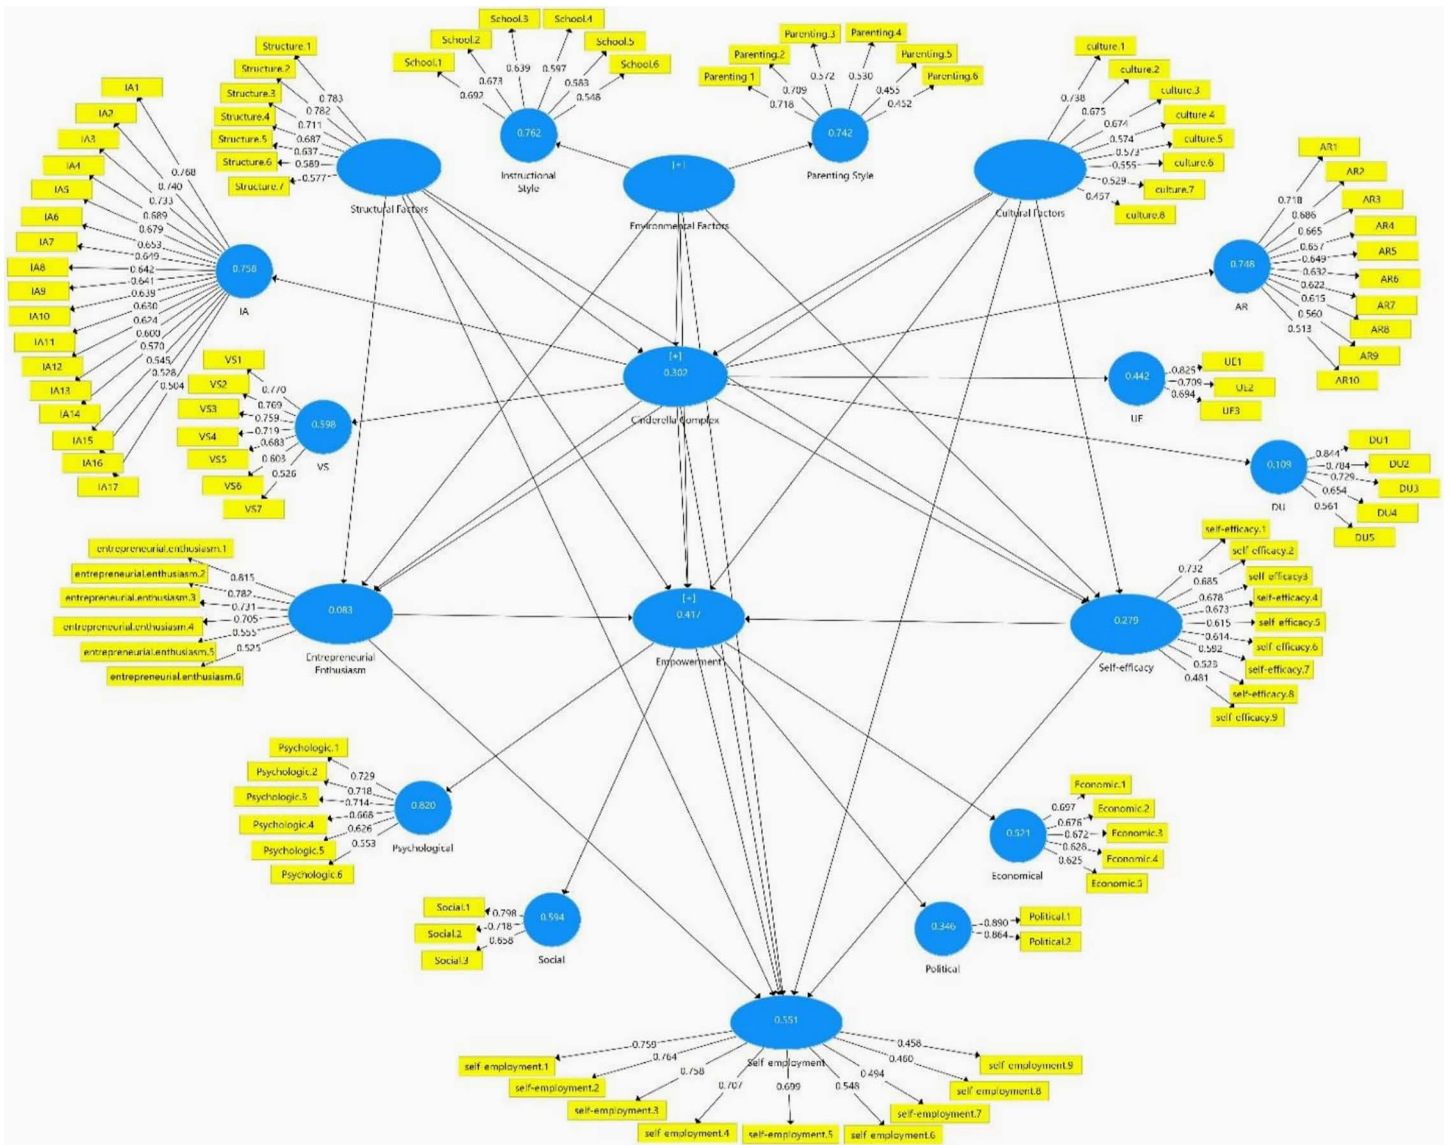

**Fig 2. Measurement model of the research variables.**

<https://doi.org/10.1371/journal.pone.0337652.g002>

acceptable when the AVE of a latent variable is greater than its correlation with other latent variables. For discriminant validity, a matrix is drawn as shown in Table 6, where the cells contain correlation coefficients between the components, and the diagonal of the matrix contains the square roots of the AVE values for each component. Discriminant validity is considered acceptable when the diagonal values are higher than the values below them. According to Table 6, the latent variables of Cinderella complex with a value of 0.761, cultural factors with a value of 0.707, empowerment with a value of 0.741, entrepreneurial enthusiasm with a value of 0.761, environmental factors with a value of 0.721, self-efficacy with a value of 0.707, self-employment with a value of 0.712, and structural factors with a value of 0.754, all have the highest square root of AVE compared to their corresponding correlations, confirming the discriminant validity of the research model.

**Table 5. Results of the convergent validity and reliability of self-efficacy, entrepreneurial enthusiasm, self-employment, cultural and structural factors.**

| Variable                   | Items                                                                                                                                                               | Factor Loading | Cronbach Alpha | CR    | AVE   |
|----------------------------|---------------------------------------------------------------------------------------------------------------------------------------------------------------------|----------------|----------------|-------|-------|
| Self-Efficacy              | Confidence in achieving plans and goals and putting them into action                                                                                                | 0.686          | 0.803          | 0.848 | 0.501 |
|                            | Giving up and not making an effort when unable to accomplish something for the first time                                                                           | 0.684          |                |       |       |
|                            | Ensuring adaptability when encountering unexpected situations such as price fluctuations, natural disasters, the entry of competitors, or similar products, etc.    | 0.671          |                |       |       |
|                            | Ensuring the effective completion of various tasks (such as household chores, work outside the home, caregiving for parents, etc.)                                  | 0.663          |                |       |       |
|                            | Becoming anxious when facing new and complex phenomena due to doubt about one's own performance                                                                     | 0.659          |                |       |       |
|                            | Focusing on completing a difficult task instead of feeling discouraged                                                                                              | 0.642          |                |       |       |
|                            | The ability to find more than one solution when facing a problem                                                                                                    | 0.548          |                |       |       |
|                            | The ability to stay calm and rely on one's abilities when facing problems, even if they are more difficult than expected                                            | 0.544          |                |       |       |
|                            | Success in choosing any career path                                                                                                                                 | 0.457          |                |       |       |
| Entrepreneurial Enthusiasm | Continuous thinking about entrepreneurship and starting a personal business                                                                                         | 0.841          | 0.779          | 0.842 | 0.580 |
|                            | Great passion for entrepreneurship and personal business                                                                                                            | 0.777          |                |       |       |
|                            | Desire to start a business and daydreaming about it                                                                                                                 | 0.751          |                |       |       |
|                            | Enhancement of personal experience through entrepreneurship and starting a business                                                                                 | 0.702          |                |       |       |
|                            | A sense of identity solely through entrepreneurship and personal business, and the inability to live without it                                                     | 0.547          |                |       |       |
|                            | A willingness to dedicate oneself to entrepreneurial activities                                                                                                     | 0.465          |                |       |       |
| Self-Employment            | Agreement with registering a business and producing products or offering services based on personal skills, as well as creating employment opportunities for others | 0.786          | 0.813          | 0.855 | 0.507 |
|                            | Achieving all life goals through starting a personal business                                                                                                       | 0.747          |                |       |       |
|                            | Putting in maximum effort to start and manage a personal business                                                                                                   | 0.741          |                |       |       |
|                            | The individual's willingness to work in an environment where they own the business themselves                                                                       | 0.724          |                |       |       |
|                            | Striving to implement ideas through launching a personal business, considering the saturation of public sector jobs                                                 | 0.699          |                |       |       |
|                            | Having sufficient experience to start a personal business                                                                                                           | 0.557          |                |       |       |
|                            | Seeing oneself starting a personal business in the near future                                                                                                      | 0.478          |                |       |       |
|                            | Ability to start a business using personal and family capital                                                                                                       | 0.452          |                |       |       |
|                            | Starting a personal business is preferable due to the waste of valuable talents when working for others                                                             | 0.426          |                |       |       |
| Cultural Factors           | The acceptance of women's and girls' participation in jobs outside the home by society                                                                              | 0.736          | 0.754          | 0.817 | 0.500 |
|                            | The possibility for girls to travel independently without their family                                                                                              | 0.672          |                |       |       |
|                            | The possibility of allowing women to pursue education or work after marriage                                                                                        | 0.672          |                |       |       |
|                            | The possibility of men and women working together in a joint business venture                                                                                       | 0.578          |                |       |       |
|                            | Equal division of household chores between men and women                                                                                                            | 0.572          |                |       |       |
|                            | The possibility of women being able to stay outside the home and feel safe after dark                                                                               | 0.559          |                |       |       |
|                            | The permission for women to seek divorce in case of problems and incompatibility after marriage                                                                     | 0.527          |                |       |       |
|                            | The right of women to obtain custody of children after marriage                                                                                                     | 0.463          |                |       |       |

(Continued)

**Table 5.** (Continued)

| Variable           | Items                                                                                                              | Factor Loading | Cronbach Alpha | CR    | AVE   |
|--------------------|--------------------------------------------------------------------------------------------------------------------|----------------|----------------|-------|-------|
| Structural Factors | The greater difficulties and challenges faced by women in accessing loans and financial facilities compared to men | 0.784          | 0.812          | 0.859 | 0.570 |
|                    | The limited access of women to loans, credits, and financial facilities                                            | 0.782          |                |       |       |
|                    | Greater attention to men's opinions in work environments                                                           | 0.713          |                |       |       |
|                    | Greater allocation of managerial and executive positions to men                                                    | 0.687          |                |       |       |
|                    | Employers' preference for hiring male workers                                                                      | 0.639          |                |       |       |
|                    | Higher income levels of employed men                                                                               | 0.584          |                |       |       |
|                    | Lower job security and stability for women                                                                         | 0.575          |                |       |       |

<https://doi.org/10.1371/journal.pone.0337652.t005>

**Table 6. Results of the discriminant validity of research variables.**

| Variables                  | Cinderella complex | Cultural factors | Empowerment | Entrepreneurial Enthusiasm | Environmental factors | Self-efficacy | Self-Employment | Structural factors |
|----------------------------|--------------------|------------------|-------------|----------------------------|-----------------------|---------------|-----------------|--------------------|
| Cinderella complex         | 0.761              |                  |             |                            |                       |               |                 |                    |
| Cultural factors           | -0.350             | 0.707            |             |                            |                       |               |                 |                    |
| Empowerment                | -0.389             | 0.412            | 0.741       |                            |                       |               |                 |                    |
| Entrepreneurial Enthusiasm | -0.209             | 0.186            | 0.351       | 0.761                      |                       |               |                 |                    |
| Environmental factors      | 0.520              | -0.354           | -0.173      | -0.054                     | 0.721                 |               |                 |                    |
| Self-Efficacy              | -0.508             | 0.305            | 0.573       | 0.368                      | -0.254                | 0.707         |                 |                    |
| Self-Employment            | -0.320             | 0.305            | 0.379       | 0.697                      | -0.133                | 0.441         | 0.712           |                    |
| Structural factors         | 0.193              | -0.212           | -0.043      | 0.086                      | 0.358                 | -0.118        | 0.051           | 0.754              |

<https://doi.org/10.1371/journal.pone.0337652.t006>

After confirming the validity and reliability of the overall research model, separate confirmatory factor analyses (CFAs) were conducted for three multidimensional constructs—Cinderella Complex, Empowerment, and Environmental Factors—due to their more complex measurement structures. Each construct comprised multiple components, with several items designed for each component. For these constructs, items with low factor loadings were removed, while the retained items demonstrated satisfactory standardized loadings, composite reliability, Cronbach's alpha values above 0.70, and average variance extracted (AVE) exceeding recommended thresholds, thereby establishing convergent validity. Discriminant validity was also confirmed, indicating that the subcomponents were distinct from one another. Collectively, these results support the robustness of the measurement model for the three constructs. Detailed factor loadings, reliability indices, and discriminant validity matrices are reported in [Appendices S1–S3](#).

#### 4.6. Factors influencing the self-employment of rural women: Causal analysis

The results of the path analysis of the causal model for factors influencing self-employment among rural women are presented in [Fig 3](#). In this analysis, the effects of a set of variables on each other were calculated using AMOS<sub>24</sub> software, and the standardized path coefficients were obtained. Coefficients below 0.10 indicate weak effects, values between 0.10 and 0.30 represent moderate effects, and values of 0.50 and above indicate strong effects of one variable on another [86]. As for the model fit indices listed in [Table 7](#), it can be seen that all indices are within acceptable thresholds, indicating a good fit for the causal model.

**4.6.1. Causal effects of variables on the first-level mediating variable: Cinderella complex.** The causal effects of the independent variables on the Cinderella complex are summarized in [Table 8](#) and illustrated in [Fig 3](#). The results show that environmental factors exert a direct, positive, and significant influence on the Cinderella complex ( $\beta = 0.441$ ,

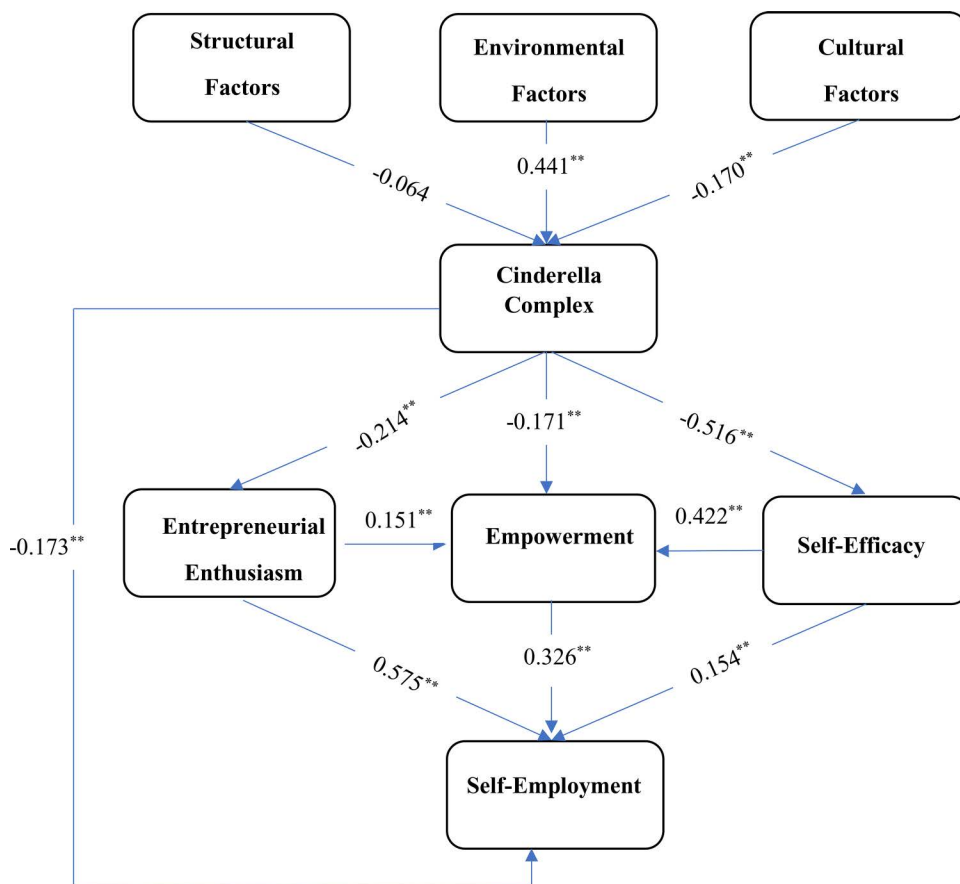

Fig 3. Causal model of factors influencing self-employment among rural women.

<https://doi.org/10.1371/journal.pone.0337652.g003>

Table 7. Goodness of fit measures of structural equation model of self-employment.

| Index         | Expected | Computed |
|---------------|----------|----------|
| Chi-square    | –        | 144.500  |
| df            | –        | 35       |
| Chi-square/df | 5≥       | 4.12     |
| GFI           | 0.9≤     | 0.969    |
| NFI           | 0.9≤     | 0.945    |
| CFI           | 0.9≤     | 0.956    |
| RMSEA         | 0.06≥    | 0.028    |

<https://doi.org/10.1371/journal.pone.0337652.t007>

$p=0.0001$ ), thereby supporting  $H2$ . This finding indicates that environmental factors play a crucial role in shaping and reinforcing the Cinderella complex. In particular, parenting styles within families, as well as the educational environments provided in schools and universities for girls, contribute to both the emergence and the intensification of this complex.

Furthermore, the analysis reveals that cultural factors have a direct, negative, and significant effect on the Cinderella complex ( $\beta=-0.170$ ,  $p=0.0001$ ), providing support for  $H1$ . This outcome suggests that contemporary cultural conditions encourage women’s independence and reduce their inclination toward dependence on men. In contrast, structural factors show no significant direct effect on the Cinderella complex, leading to the rejection of  $H3$  ( $\beta=-0.064$ ,  $p=0.163$ ).

**Table 8. Total and direct effects of research variables on Cinderella complex.**

| Variables             | Standardized direct effects | Standardized total effects | Sig.   |
|-----------------------|-----------------------------|----------------------------|--------|
| Structural factors    | -0.064                      | -0.064                     | 0.163  |
| Environmental factors | 0.441                       | 0.441                      | 0.0001 |
| Cultural factors      | -0.170                      | -0.170                     | 0.0001 |

<https://doi.org/10.1371/journal.pone.0337652.t008>

**4.6.2. Causal effects of variables on the second-level mediating variables.** The results in [Table 9](#) demonstrate that the Cinderella complex exerts a direct, negative, and significant effect on entrepreneurial enthusiasm ( $\beta = -0.214$ ,  $p = 0.0001$ ), confirming *H4*. This finding indicates that women with a stronger Cinderella complex—characterized by higher psychological dependency—exhibit lower levels of interest and enthusiasm toward entrepreneurship. Conversely, as the intensity of the Cinderella complex decreases and independence increases, women’s entrepreneurial enthusiasm rises. In addition, cultural factors indirectly influence entrepreneurial enthusiasm through their effect on the Cinderella complex (0.036). Environmental factors exert an indirect, negative effect (-0.094).

Regarding self-efficacy, the Cinderella complex demonstrates a direct, negative, and significant effect ( $\beta = -0.516$ ,  $p = 0.0001$ ), thereby supporting *H6*. These results suggest that higher levels of the Cinderella complex diminish women’s self-efficacy. Cultural factors exert a positive indirect effect (0.088) via the Cinderella complex, while environmental factors influence self-efficacy indirectly and negatively (-0.228).

As shown in [Fig 3](#), the results further indicate that the Cinderella complex has a direct, negative, and significant effect on empowerment ( $\beta = -0.171$ ,  $p = 0.0001$ ), confirming *H5*. This suggests that dependency is incompatible with empowerment; women with a higher Cinderella complex are less likely to feel empowered. Conversely, entrepreneurial enthusiasm has a direct, positive, and significant effect on empowerment ( $\beta = 0.151$ ,  $p = 0.0001$ ), confirming *H8*. This highlights that women who are more enthusiastic about entrepreneurship are more likely to achieve empowerment. Finally, self-efficacy has a direct, positive, and significant impact on empowerment ( $\beta = 0.422$ ,  $p = 0.0001$ ), confirming *H10*, showing that higher self-efficacy strongly enhances women’s empowerment. In terms of indirect effects, environmental factors negatively influence empowerment (-0.186) through their impact on the Cinderella complex. Cultural factors indirectly enhance empowerment (0.071) through their effect on the Cinderella complex.

**4.6.3. Causal effects of research variables on the dependent variable: Self-employment.** The results of [Table 10](#) indicate that the Cinderella complex has a direct, negative, and significant effect on self-employment ( $\beta = -0.173$ ,  $p = 0.0001$ ), confirming *H7*. As a central factor in this study, the Cinderella complex reduces the likelihood of self-employment, suggesting that women who exhibit higher levels of dependency—stemming from fears of independence, avoidance of responsibility, and related psychological patterns—are less inclined to initiate entrepreneurial activities or establish their own businesses. Accordingly, creating conditions that prevent the emergence and intensification of the Cinderella complex among women is essential for fostering self-employment. Beyond its direct impact, the Cinderella

**Table 9. Total, direct and indirect effects of research variables on entrepreneurial enthusiasm, self-efficacy and empowerment.**

| Mediator                   | Variables                  | Standardized direct effects | Standardized indirect effects | Standardized total effects | Sig.   |
|----------------------------|----------------------------|-----------------------------|-------------------------------|----------------------------|--------|
| Entrepreneurial enthusiasm | Cinderella complex         | -0.214                      | –                             | -0.214                     | 0.0001 |
| Self-efficacy              | Cinderella complex         | -0.516                      | –                             | -0.516                     | 0.0001 |
| Empowerment                | Cinderella complex         | -0.171                      | -0.250                        | -0.421                     | 0.0001 |
|                            | Entrepreneurial enthusiasm | 0.151                       | –                             | 0.151                      | 0.0001 |
|                            | Self-efficacy              | 0.422                       | –                             | 0.422                      | 0.0001 |

<https://doi.org/10.1371/journal.pone.0337652.t009>

**Table 10. Total, direct and indirect effects of research variables on self-employment.**

| Variables                  | Standardized direct effects | Standardized indirect effects | Standardized total effects | Sig.   |
|----------------------------|-----------------------------|-------------------------------|----------------------------|--------|
| Cinderella complex         | -0.173                      | -0.213                        | -0.386                     | 0.0001 |
| Entrepreneurial enthusiasm | 0.575                       | 0.004                         | 0.579                      | 0.0001 |
| Self-efficacy              | 0.154                       | 0.011                         | 0.165                      | 0.001  |
| Empowerment                | 0.326                       | –                             | 0.326                      | 0.006  |

<https://doi.org/10.1371/journal.pone.0337652.t010>

complex also exerts an indirect negative effect on self-employment (−0.213). This occurs primarily through its adverse influence on entrepreneurial enthusiasm, empowerment, and self-efficacy.

The findings further reveal that entrepreneurial enthusiasm has a direct, positive, and significant effect on self-employment ( $\beta=0.575$ ,  $p=0.0001$ ), thereby supporting *H9*. This demonstrates that women with higher entrepreneurial enthusiasm are more motivated to pursue self-employment, as enthusiasm propels them toward entrepreneurial action. Similarly, self-efficacy shows a direct, positive, and significant effect on self-employment ( $\beta=0.154$ ,  $p=0.001$ ), confirming *H11*. Women with stronger self-efficacy—expressed as greater confidence in their abilities—are more likely to establish self-employment ventures. In addition, self-efficacy indirectly influences self-employment through related pathways (0.011).

The analysis also highlights that empowerment exerts a direct, positive, and significant influence on self-employment ( $\beta=0.326$ ,  $p=0.006$ ), supporting *H12*. Women who are more socially engaged and exercise greater control and mastery over their lives demonstrate higher levels of empowerment, which increases their likelihood of pursuing self-employment. With respect to contextual variables, cultural factors indirectly and positively affect self-employment (0.066). In contrast, environmental factors negatively influence self-employment indirectly (−0.170) through their impact on the Cinderella complex and other mediating variables. Finally, structural factors exert an indirect effect on self-employment (0.025), primarily through their influence on entrepreneurial enthusiasm.

## 5. Discussion

The findings of this study highlight several important associations between psychological, socio-cultural, and structural factors and rural women’s engagement in self-employment. In line with theoretical expectations, the results indicate that the Cinderella complex is negatively associated with women’s self-employment. Women exhibiting higher levels of psychological dependency, avoidance of responsibility, and reliance on external validation tend to report lower levels of entrepreneurial engagement. This observation is consistent with psycho-social theories emphasizing the role of internalized social roles and self-perception in shaping behavior [87]. From the perspective of social cognitive theory, individuals’ beliefs about their capabilities and autonomy influence their goal-directed behavior [35]. Accordingly, women with stronger Cinderella complex traits may experience reduced confidence and a preference for avoiding responsibility, which are associated with lower self-reported entrepreneurial activity. Moreover, the Cinderella complex was linked to lower levels of entrepreneurial enthusiasm, suggesting that internalized dependency may constrain motivational states that support entrepreneurial aspirations.

Self-efficacy emerged as an important psychological correlate of self-employment. Women with higher self-efficacy tended to report greater engagement in entrepreneurial activities, highlighting the potential role of confidence and perceived competence in shaping women’s entrepreneurial intentions. This association aligns with Bandura’s theory, which emphasizes that self-efficacy influences persistence, goal-setting, and task-oriented behaviors [88]. In the current study, self-efficacy was also associated with empowerment, suggesting that women who perceive themselves as capable may feel more control over their personal and economic decisions, which in turn is linked to greater participation in self-employment. Similarly, entrepreneurial enthusiasm was positively associated with self-employment, indicating that women

who report higher levels of motivation, interest, and affective engagement toward entrepreneurial activities are more likely to pursue self-employment. This relationship can be understood through the lens of SCT, where motivational states and outcome expectations influence goal-directed behaviors [89]. Enthusiasm also appeared to be related to empowerment, suggesting that motivational engagement may contribute to women's perceived agency and proactive decision-making in entrepreneurial contexts.

Empowerment itself was positively associated with self-employment, reinforcing the notion that women who perceive greater control over resources and decision-making are more inclined to participate in entrepreneurial activities. This observation aligns with prior literature highlighting empowerment as a key enabler of women's economic engagement and social agency [90,91].

In addition to psychological factors, the analysis highlighted the relevance of contextual variables. Cultural factors were indirectly linked to self-employment through their association with the Cinderella complex, suggesting that more supportive cultural norms are associated with lower dependency tendencies and, subsequently, higher entrepreneurial engagement. Structural factors, while not directly associated with self-employment, were indirectly linked through entrepreneurial enthusiasm, implying that access to education, resources, and social networks may foster motivational states that encourage women's entrepreneurial activity. These findings are consistent with resource-based perspectives, which emphasize the role of access to tangible and intangible resources in supporting entrepreneurial engagement [92].

These findings suggest that psychological constructs such as the Cinderella complex, self-efficacy, entrepreneurial enthusiasm, and empowerment are meaningfully associated with women's self-employment. However, given the cross-sectional nature of the data, it is important to interpret these associations cautiously. While the results are consistent with theoretical expectations, they do not allow for causal inferences. Future research employing longitudinal or experimental designs would be needed to establish directional or causal relationships among these variables.

This study underscores the importance of integrating psychological, socio-cultural, and structural perspectives when examining women's entrepreneurial engagement in rural contexts. The findings highlight those interventions aimed at fostering self-efficacy, empowerment, and entrepreneurial motivation, alongside supportive cultural and structural conditions, may be associated with greater participation of women in self-employment.

## 6. Conclusion

This study has provided valuable insights into the psychological, socio-cultural, and environmental factors associated with self-employment among rural women. By examining the roles of the Cinderella complex, entrepreneurial enthusiasm, self-efficacy, and empowerment, it has become evident that these factors are meaningfully associated with the entrepreneurial behaviors and decisions of rural women. While cognitive and socio-cultural barriers such as the Cinderella complex present substantial challenges, there is also a clear opportunity to foster entrepreneurial enthusiasm and self-efficacy, which may serve as important enablers for self-employment.

The findings underscore the need for a comprehensive approach to address both the cognitive barriers and socio-cultural constraints that are linked to limited entrepreneurial potential. Women in rural areas, particularly in countries like Iran, often face systemic and psychological obstacles that hinder their entrepreneurial ambitions. However, these challenges are not insurmountable. Rather, they call for targeted interventions that can address these barriers while simultaneously supporting the development of empowerment, self-efficacy, and entrepreneurial motivation.

One of the key recommendations arising from this study is the urgent need for gender-sensitive policies that promote equality and provide women with equal opportunities in all aspects of life, particularly in business and entrepreneurship. Governments should prioritize initiatives that address legal and cultural barriers preventing women from accessing resources and pursuing entrepreneurial ventures. This includes removing discriminatory practices in the legal system, ensuring equal access to financial resources, and promoting fair representation of women in leadership roles. Furthermore, given the psychological constraints highlighted by the Cinderella complex, it is crucial to develop programs aimed

at enhancing women's mental and emotional resilience. Community-based initiatives that provide mentorship, leadership training, and psychological support can help women challenge traditional gender norms and gradually shift internalized dependency patterns, thereby supporting greater engagement in entrepreneurial activity.

Education and training are also critical to increasing entrepreneurial enthusiasm and self-efficacy. Investing in both formal and informal educational programs that focus on entrepreneurial skills, business management, and financial literacy can help rural women gain the tools they need to pursue and sustain their own businesses. Moreover, building strong support networks for rural women entrepreneurs is essential. These networks should facilitate the sharing of experiences, resources, and knowledge, enabling women to overcome the isolation that often characterizes rural settings. Collaborations with local businesses, NGOs, and community organizations can extend these networks and create opportunities for women to access broader markets, consistent with the observed associations between structural factors and entrepreneurial enthusiasm in our study. Lastly, media and public awareness campaigns can play a pivotal role in shifting societal perceptions and inspiring change. By showcasing successful female entrepreneurs and promoting the value of women's economic independence, media outlets can help challenge stereotypes and encourage other women to pursue entrepreneurship. Highlighting the achievements of rural women can reinforce empowerment and self-efficacy, further supporting their motivation to engage in self-employment.

In conclusion, addressing the socio-psychological and structural factors associated with the self-employment potential of rural women is crucial not only for empowering women but also for fostering sustainable economic development in rural communities. By implementing these recommendations, countries like Iran can support the realization of untapped entrepreneurial potential among rural women, contributing to a more inclusive and resilient economy.

### 6.1. Research limitations

While this study provides valuable insights, it is important to acknowledge several limitations. First, the research is limited by its focus on a specific geographical area, particularly rural women in Iran. The contextual differences in gender roles, cultural norms, and economic conditions across different countries or regions could lead to variations in the factors that affect self-employment decisions among women. Furthermore, while the study includes several key psychological and socio-environmental factors, there may be other significant variables not considered here. For instance, external factors such as market conditions, access to technology, and the impact of social media on entrepreneurial activities were not directly addressed. Lastly, while the study emphasizes women's psychological barriers and socio-cultural constraints, it does not explore the role of male counterparts, family dynamics, or male-dominated social structures in influencing women's entrepreneurial aspirations.

### 6.2. Future directions

It would be beneficial to investigate how cultural and religious influences intersect with women's entrepreneurial motivations. This could be done by comparing rural women in different regions across different cultural contexts globally. Such studies could examine the nuances of local norms, values, and religious beliefs in shaping women's self-perception and entrepreneurial aspirations. Another promising direction for future research involves the role of men and family dynamics in supporting or hindering women's entrepreneurial efforts. Understanding how men's roles—whether as partners, fathers, or community leaders—interact with women's entrepreneurial goals would add another layer of understanding to the socio-cultural context in which rural women operate. In patriarchal settings, the influence of male family members or male-dominated networks could either facilitate or constrain women's participation in entrepreneurial activities. Additionally, exploring intervention strategies that can be practically applied to reduce psychological barriers, such as the Cinderella complex, and enhance self-efficacy and entrepreneurial enthusiasm among rural women, would be a critical area for applied research. These interventions could be developed into programs tailored to rural contexts, providing women with the resources, skills, and emotional support needed to pursue self-employment successfully.

Future studies could also examine the role of governmental policies and institutional initiatives aimed at fostering entrepreneurial efficacy among women. For example, national or local programs that provide training, access to credit, mentorship, and entrepreneurial networks could be evaluated for their effectiveness in enhancing women's self-efficacy and reducing dependency-related psychological barriers. Furthermore, investigating urban versus rural differences would offer valuable insights into potential moderating effects of geographic and infrastructural factors on the pathways linking the Cinderella complex, self-efficacy, and entrepreneurial behavior. Such comparative studies could reveal whether intervention strategies need to be tailored differently across contexts and could inform policy design to more effectively promote women's self-employment.

## Supporting information

### **S1 Appendix. CFA details for *Cinderella complex*.**

(DOCX)

### **S2 Appendix. CFA details for *empowerment*.**

(DOCX)

### **S3 Appendix. CFA details for *environmental factors*.**

(DOCX)

### **S4 Appendix. De-identified dataset supporting the findings of this study.**

(XLSX)

## Author contributions

**Conceptualization:** Mahsa Fatemi.

**Data curation:** Zahra Seyedtabatabaei, Mahsa Fatemi.

**Formal analysis:** Zahra Seyedtabatabaei, Mahsa Fatemi.

**Funding acquisition:** Mahsa Fatemi.

**Investigation:** Zahra Seyedtabatabaei.

**Methodology:** Zahra Seyedtabatabaei, Mahsa Fatemi.

**Project administration:** Mahsa Fatemi.

**Resources:** Mahsa Fatemi.

**Software:** Zahra Seyedtabatabaei, Mahsa Fatemi.

**Supervision:** Mahsa Fatemi.

**Validation:** Zahra Seyedtabatabaei, Mahsa Fatemi.

**Visualization:** Zahra Seyedtabatabaei.

**Writing – original draft:** Zahra Seyedtabatabaei, Mahsa Fatemi.

**Writing – review & editing:** Zahra Seyedtabatabaei, Mahsa Fatemi.

## References

1. World Economic Forum. Global gender gap report 2023. 2023. <https://www.weforum.org/publications/global-gender-gap-report-2023/in-full/gender-gaps-in-the-workforce/>
2. Badzaban F, Rezaei-Moghaddam K, Fatemi M. Analysing the individual entrepreneurial resilience of rural women. *J Glob Entrepr Res.* 2021;11(1):241–54. <https://doi.org/10.1007/s40497-021-00290-1>

3. Bermúdez Figueroa E, Dabetić V, Yuste RP, Saeidzadeh Z. Gender and Structural Inequalities from a Socio-Legal Perspective. Springer Textbooks in Law. Springer International Publishing. 2023. 95–142. [https://doi.org/10.1007/978-3-031-14360-1\\_4](https://doi.org/10.1007/978-3-031-14360-1_4)
4. Khan R, Khan S, Khan M. Impact of socio-cultural factors on women's higher education. *Pak Rev Soc Sci.* 2020;1(2):36–46.
5. Usmani S, Ali EHF, Kottaparamban M, Hadi S. Role of feminist theories in addressing issues of gender diversity. *Kurd Stud.* 2023;11(3):439–52. <https://doi.org/10.58262/ks.v11i1.032>
6. Azizi F, Moradi F. An analysis of barriers to woman's economic participation in Iran. *Int J Humanit.* 2022;9(3):79–107.
7. Rezaei-Moghaddam K, Badzaban F, Fatemi M. Virtual social networks and rural women entrepreneurship. *Int J Bus Dev Stud.* 2023;15(2):83–100. <https://doi.org/10.22111/IJBDS.2024.47635.2086>
8. Oghazi P, Patel PC, Hajighasemi A. Gendered crisis approach: Exploring the gendered impact of Iranian sanctions on nascent entrepreneurship outcomes. *International Small Business Journal: Researching Entrepreneurship.* 2024;42(8):1016–46. <https://doi.org/10.1177/02662426241241481>
9. Seyedtabatabaei Z, Fatemi M. Exploring the effects of establishing small and medium-sized enterprises by rural women (case study: Marvdasht County, Fars Province). *Geogr Hum Relat.* 2023;6(2):208–29.
10. Rezaei-Moghaddam K, Badzaban F, Fatemi M. Entrepreneurial resilience of small and medium-sized businesses among rural women in Iran. *J Agric Educ Ext.* 2021;29(1):75–89.
11. Chipenda C. Transformative Social Policy Through Land Reform: Women's Economic Agency and Rural Social Change in Zimbabwe. *Journal of Asian and African Studies.* 2025. <https://doi.org/10.1177/00219096251313546>
12. Banazadeh A, Rezaei-Moghaddam K, Fatemi M. Determinants of the development of rural women's entrepreneurial activities in Fars Province. *Entrep Strateg Agric.* 2024;11(1):108–20.
13. Banazadeh A, Rezaei-Moghaddam K, Fatemi M. Factors affecting the entrepreneurial activities of rural women in Iran. *Int J Bus Dev Stud.* 2024;16(1):123–46. <https://doi.org/10.22111/IJBDS.2024.48610.2109>
14. Rezaei-Moghaddam K, Fatemi M, Ghafouri M, Golkarfard M. Entrepreneurship as a driver of rural women's empowerment in Iran. *Sci Rep.* 2025;15(1):41972. <https://doi.org/10.1038/s41598-025-25955-9> PMID: 41290906
15. Rezaei-Moghaddam K, Karami O, Fatemi M. The comparative analysis of marketing activities among rural women entrepreneurs in Fars Province, Iran. *J Glob Entrep Res.* 2019;9(65):1–20.
16. Karimi-Amaleh Z, Fatemi M. Determinants of the development of rural women's entrepreneurial activities: The case of the Omid entrepreneurship fund in Larestan county. *J Entrep Strateg Agric.* 2021;8(16):97–112.
17. Queralt J. The goods (and bads) of self-employment. *J Political Philosophy.* 2023;31(3):271–93. <https://doi.org/10.1111/jopp.12287>
18. Rezaei-Moghaddam K, Nematpour L. Participation in vermicompost production cooperatives as a strategy for empowering rural women: A case study of Fars Province. *Vill Dev.* 2014;(3):83–103.
19. Dowling C. *The Cinderella complex: Women's hidden fear of independence.* New York: Summit Books. 1981;1–291.
20. Su T, Xue Q. The Analysis of Transition in Woman Social Status—Comparing Cinderella with Ugly Betty. *JLTR.* 2010;1(5). <https://doi.org/10.4304/jltr.1.5.746-752>
21. Saha S, Tanishka S. Cinderella Complex: Theoretical Roots to Psychological Dependency Syndrome in Women. *Int J Indian Psychol.* 2016;3(3). <https://doi.org/10.25215/0303.148>
22. Joseph JB, Jaseyh S, Thomas S. Cinderella complex: a meta-analytic review. *EPRA.* 2021;:324–9. <https://doi.org/10.36713/epra6596>
23. Elkins K. The Shapes of Cinderella: Emotional Architecture and the Language of Moral Difference. *Humanities.* 2025;14(10):198. <https://doi.org/10.3390/h14100198>
24. Hina B, Agha N, Rashdi SMF. Gendered Barriers: How Patriarchal Norms Shape Married Women's Employment in Sukkur City. *IJSS.* 2025;4(3):311–8. <https://doi.org/10.63544/ijss.v4i3.169>
25. Sironić M, Dabić M. Women in international business: a systematic review of trends, themes, and future directions. *Rev Manag Sci.* 2025. <https://doi.org/10.1007/s11846-025-00932-8>
26. Jayachandran S. Social Norms as a Barrier to Women's Employment in Developing Countries. *IMF Econ Rev.* 2021;69(3):576–95. <https://doi.org/10.1057/s41308-021-00140-w>
27. Masoomi E, Rezaei-Moghaddam K. Appraisal of an opportunity-based model for rural entrepreneurial process. *J Agric Sci Technol.* 2023;25(3):509–15.
28. Golkarfard M, Rezaei-Moghaddam K. The relationship between entrepreneurship and dimensions of rural women's empowerment in Fars Province. *Entrep Strateg Agric.* 2019;6(11):1–10.
29. Diraditsile K, Ontetse MA. Lived experiences and consequences of unemployment on women: An empirical study of unemployed young women in Mahalapye, Botswana. *J Int Women's Stud.* 2017;18(4):131–43.
30. Yousefi A, Rezaei-Moghaddam K. Developing entrepreneurship in rural women's microcredit fund businesses in Marvdasht County. *Entrep Strateg Agric.* 2024;11(2):1–20.
31. Binder M, Blankenberg A-K. Self-employment and Subjective Well-Being. *SSRN Journal.* 2021. <https://doi.org/10.2139/ssrn.3768347>

32. Wellington AJ. Self-employment: the new solution for balancing family and career?. *Labour Economics*. 2006;13(3):357–86. <https://doi.org/10.1016/j.labeco.2004.10.005>
33. Nix E, Gamberoni E, Heath R. Bridging the gap: Identifying what is holding self-employed women back in Ghana, Rwanda, Tanzania, the Republic of Congo, and Uganda. *Work Bank Group*. 2014. <https://hdl.handle.net/10986/19378>
34. Bandura A. Self-efficacy: toward a unifying theory of behavioral change. *Psychol Rev*. 1977;84(2):191–215. <https://doi.org/10.1037//0033-295x.84.2.191> PMID: 847061
35. Bandura A. *Social foundations of thought and action: A social cognitive theory*. Englewood Cliffs, NJ: Prentice-Hall. 1986.
36. Bhati K, Sethy T. Self-efficacy: Theory to educational practice. *Int J Indian Psychol*. 2022;10(1):1123–8. <https://doi.org/10.25215/1001.112>
37. Wilde N, Hsu A. The influence of general self-efficacy on the interpretation of vicarious experience information within online learning. *Int J Educ Technol High Educ*. 2019;16(1). <https://doi.org/10.1186/s41239-019-0158-x>
38. Masoomi E, Rezaei-Moghaddam K, Teixeira AC. Evolution, roots and influence of the rural entrepreneurship literature: a bibliometric account. *JEC*. 2023;18(2):174–206. <https://doi.org/10.1108/jec-04-2022-0065>
39. Ferreira-Neto MN, de Carvalho Castro JL, de Sousa-Filho JM, de Souza Lessa B. The role of self-efficacy, entrepreneurial passion, and creativity in developing entrepreneurial intentions. *Front Psychol*. 2023;14:1134618. <https://doi.org/10.3389/fpsyg.2023.1134618> PMID: 36949904
40. Sulistyani NW, Suhariadi F, Fajrianti. Self-Efficacy as a Mediator of the Impact of Social Capital on Entrepreneurial Orientation: A Case of Dayak Ethnic Entrepreneurship. *Sustainability*. 2022;14(9):5620. <https://doi.org/10.3390/su14095620>
41. Caliendo M, Kritikos AS, Rodríguez D, Stier C. Self-efficacy and entrepreneurial performance of start-ups. *Small Bus Econ*. 2023;61(3):1027–51. <https://doi.org/10.1007/s11187-022-00728-0>
42. Völker M, Doneys P. Empowerment as one sees it: assessment of empowerment by women participants of development projects. *Development in Practice*. 2020;31(1):125–38. <https://doi.org/10.1080/09614524.2020.1828284>
43. Golkarfard M, Rezaei-Moghaddam K, Fatemi M. Factors affecting the development of women's entrepreneurship in agricultural development support funds in Fars Province. *Iran J Agric Econ Devel Res*. 2022;52(2):371–88.
44. Aldabbas H, Elamin AM, Gernal L, Zain A. Expatriate women's empowerment and well-being: The mediating role of community embeddedness. *Migr Lett*. 2024;21:169–78. <https://doi.org/10.59670/ml.v21i2.6034>
45. Swain RB, Wallentin FY. Does microfinance empower women? Evidence from self-help groups in India. *International Review of Applied Economics*. 2009;23(5):541–56. <https://doi.org/10.1080/02692170903007540>
46. Sinha A. Feminist perspectives on women's agency in environmental conservation and sustainability. *J Chem Health Risks*. 2024;14(1):2476–82.
47. Rajeswari S, Radha S, Kalyani KD, Mamatha B. Independent Women Being Compassionate Towards Corporate Commitment. *E3S Web Conf*. 2021;309:01013. <https://doi.org/10.1051/e3sconf/202130901013>
48. Poggi I. Enthusiasm and its contagion: Nature and function. In: *Affective Computing and Intelligent Interaction: Second International Conference, ACII 2007, Lisbon, Portugal, 2007*. 410–21.
49. Pierce JJ. Emotions and the policy process: enthusiasm, anger and fear. *Policy & Politics*. 2021;49(4):595–614. <https://doi.org/10.1332/030557321x16304447582668>
50. Maitto Q, Pacho FT, Liu J, Bhutto TA, Xuhui W. The Role of Entrepreneurial Self-Efficacy in Resources Acquisition in a New Venture: The Mediating Role of Effectuation. *Sage Open*. 2020;10(4). <https://doi.org/10.1177/2158244020963571>
51. Huang M, Wang J, Su X. The Impact of Social Support on Entrepreneurial Well-being: The Role of Entrepreneurial Passion and Entrepreneurial Efficacy. *Sage Open*. 2024;14(4). <https://doi.org/10.1177/21582440241297232>
52. Feng B, Chen M. The Impact of Entrepreneurial Passion on Psychology and Behavior of Entrepreneurs. *Front Psychol*. 2020;11:1733. <https://doi.org/10.3389/fpsyg.2020.01733> PMID: 32793066
53. Pattnaik S, Mmbaga N, White TD, Reger RK. To entrepreneur or not to entrepreneur? How identity discrepancies influence enthusiasm for academic entrepreneurship. *J Technol Transf*. 2023;49(4):1444–70. <https://doi.org/10.1007/s10961-023-09994-w>
54. Ajzen I. The theory of planned behavior. *Organizational Behavior and Human Decision Processes*. 1991;50(2):179–211. [https://doi.org/10.1016/0749-5978\(91\)90020-t](https://doi.org/10.1016/0749-5978(91)90020-t)
55. Gebauer MM, McElvany N, Köller O, Schöber C. Cross-cultural differences in academic self-efficacy and its sources across socialization contexts. *Soc Psychol Educ*. 2021;24(6):1407–32. <https://doi.org/10.1007/s11218-021-09658-3>
56. Kim U, Nugraha Y, Cahyono ABF, Tubbs N. Religious, Cultural and Self-efficacy Beliefs Influencing Subjective Well-being in Korea and Indonesia: Psychological, Relational, Social and Cultural Analysis. *Psychology and Developing Societies*. 2025;37(1):11–71. <https://doi.org/10.1177/09713336251389651>
57. Galsanjigmed E, Sekiguchi T. Challenges Women Experience in Leadership Careers: An Integrative Review. *Merits*. 2023;3(2):366–89. <https://doi.org/10.3390/merits302021>
58. Peetz D, Murray G. *Women, Labor Segmentation and Regulation*. Palgrave Macmillan US. 2017. <https://doi.org/10.1057/978-1-137-55495-6>
59. Jan SQ, Junfeng J, Iqbal MB. Examining the factors linking the intention of female entrepreneurial mindset: A study in Pakistan's small and medium-sized enterprises. *Heliyon*. 2023;9(11):e21820. <https://doi.org/10.1016/j.heliyon.2023.e21820> PMID: 38034659

60. Taraghi M, Yoder L. Integrating the theory of planned behavior in agent-based models: A systematic review of applications of pro-environmental behaviors. *Ecological Modelling*. 2025;508:111231. <https://doi.org/10.1016/j.ecolmodel.2025.111231>
61. Karami O, Fatemi M, Rezaei-Moghaddam K, Ghafouri M. Gender, entrepreneurship, and marketing: Barriers and drivers for rural women in Iran. *Sustainable Futures*. 2025;10:101124. <https://doi.org/10.1016/j.sfr.2025.101124>
62. Pacheco L, Lobão J, Coelho S. Gender and Risk Aversion: Evidence from a Natural Experiment. *Games*. 2023;14(3):49. <https://doi.org/10.3390/g14030049>
63. Behrouz M, Kazemi M. Investigating the effect of entrepreneurial passion mediated by the entrepreneurial self-efficacy on the entrepreneurial intention of women entrepreneurs: The mediating role of Cinderella Syndrome. *Educ Manag Entrep*. 2023;2(1):21–40. <https://doi.org/10.22126/eme.2023.9098.1026>
64. Jyoti J, Dash G, Rani A, Kour S, Nasser LK. Self-efficacy and women sustainable entrepreneurship in an emerging economy: Role of bricolage and attitude in the era of open innovation. *Journal of Open Innovation: Technology, Market, and Complexity*. 2025;11(3):100572. <https://doi.org/10.1016/j.joitmc.2025.100572>
65. Krejcie RV, Morgan DV. Determining sample size for research activities. *Educ Psychol Meas*. 1970;30:607–10.
66. Bota OA, Petre C. Educational Style Impact on Student Academical Achievements. *Procedia - Social and Behavioral Sciences*. 2015;177:127–31. <https://doi.org/10.1016/j.sbspro.2015.02.360>
67. Mariappan R, Joseph R. Parenting styles and academic performance of school children. *Int J Sci Res*. 2015;4:645–7.
68. Ocasio W. Institutions and Their Social Construction: A Cross-Level Perspective. *Organization Theory*. 2023;4(3). <https://doi.org/10.1177/26317877231194368>
69. Spencer-Oatey H, Franklin P. What is culture. A compilation of quotations. *GlobalPAD Core Concepts*. 2012;1(22):1–21.
70. Pattnaik S, Mmbaga N, White TD, Reger RK. To entrepreneur or not to entrepreneur? How identity discrepancies influence enthusiasm for academic entrepreneurship. *J Technol Transf*. 2024;49(4):1444–70.
71. Eger C, Miller G, Scarles C. Gender and capacity building: A multi-layered study of empowerment. *World Development*. 2018;106:207–19. <https://doi.org/10.1016/j.worlddev.2018.01.024>
72. Pareja-Cano B, Valor C, Benito A. How Social Enterprises Nurture Empowerment: A Grounded Theoretical Model of Social Change. *Journal of Social Entrepreneurship*. 2020;14(1):29–49. <https://doi.org/10.1080/19420676.2020.1821753>
73. Oseghale IA, Jirgi JA, Ibrahim DF, Ogaji A, Ojo OA, Bako UR, et al. Assessment of the economic empowerment of women before and after establishment of the economic community of west African States (ECOWAS). *J Int Women's Stud*. 2024;26(3):10–3.
74. Herrmann P. Social empowerment— a matter of enabling society to cope with personalities. In: Taipei, GIS Convention Center, National Taiwan University, 2007. <http://dx.doi.org/10.13140/RG.2.1.5173.6168>
75. Llorente-Alonso M, García-Ael C, Topa G. A meta-analysis of psychological empowerment: Antecedents, organizational outcomes, and moderating variables. *Curr Psychol*. 2023;43(2):1759–84. <https://doi.org/10.1007/s12144-023-04369-8>
76. Varghese T. The Impact of Women's Political Empowerment Policy: A Perspective from the Idukki District of Kerala. *PPAdm*. 2019;18(3):59–72. <https://doi.org/10.5755/j01.ppa.18.3.24710>
77. Maddux JE. Self-Efficacy. *Interpersonal and Intrapersonal Expectancies*. Routledge. 2016. 41–6. <https://doi.org/10.4324/9781315652535-5>
78. Wan L. Literature Review about the Influence Factors of Self-Employment. *AJIBM*. 2017;07(02):79–92. <https://doi.org/10.4236/ajibm.2017.72007>
79. Rezaei A, Fatemi M, Shennan C. Healthy agricultural production: a socio-psychological and environmental approach to sustainable food systems in Fars province, Iran. *Front Sustain Food Syst*. 2025;9. <https://doi.org/10.3389/fsufs.2025.1539777>
80. IRNA. The literacy rate difference between women and men is less than 6%. 2021. <https://irna.ir/xjH3g5>
81. Javan Online. Women's literacy revolution: Unpublished report on major achievements of women after the revolution. Javan Online. 2022. <http://www.javanonline.com/>
82. IRNA. Women constitute 47.6% of the country's student population. 2020. <https://irna.ir/xjCpSq>
83. Bhuwana P, Mukherji A, Swaminathan H. Women's education through empowerment: Evidence from a community-based program. *World Development Perspectives*. 2024;33:100568. <https://doi.org/10.1016/j.wdp.2024.100568>
84. Tamvada JP, Shrivastava M, Mishra TK. Education, social identity and self-employment over time: evidence from a developing country. *Small Bus Econ*. 2022;59(4):1449–68. <https://doi.org/10.1007/s11187-021-00583-5>
85. Rönkkö M, Cho E. An Updated Guideline for Assessing Discriminant Validity. *Organizational Research Methods*. 2020;25(1):6–14. <https://doi.org/10.1177/1094428120968614>
86. Fatemi M, Rezaei-Moghaddam K, Wackernagel M. How agricultural extension shapes farmers' attitudes toward the eco-development paradigm for sustainability in Iran. *Environmental and Sustainability Indicators*. 2025;26:100673. <https://doi.org/10.1016/j.indic.2025.100673>
87. Randhawa N, Dutt S. Relationship between Cinderella complex and life satisfaction among working and non-working women – a comparative study. *Educ Soc*. 2023;46(3):890–908.
88. Popescu A, Nikolova M, Nasrin S. The Impact of Self-Efficacy Training on Goal Setting and Academic Persistence. *JAYPS*. 2024;5(4):167–76. <https://doi.org/10.61838/kman.jayps.5.4.18>

89. Bandura A. Self-efficacy: The exercise of control. New York, NY: W. H. Freeman. 1997.
90. Samadzad S. Investigating the impact of empowerment on entrepreneurship with emphasis on social innovation in informal settlements in Tabriz. *IJIMES*. 2023;3(4):35–47. <https://doi.org/10.59615/ijimes.3.4.35>
91. Al Omoush KS. *Fostering Women Entrepreneurs: Exploring the Drivers of Successful Social Commerce Business Adoption Among Women*. Sage Open. 2024;14(3). <https://doi.org/10.1177/21582440241282952>
92. Barney JB, Clark DN. *Resource-Based Theory*. Oxford University PressOxford. 2007. <https://doi.org/10.1093/oso/9780199277681.001.0001>
